# Supplementary material for: Dermoscopy of Bacterial, Viral, and Fungal Skin Infections: A Systematic Review of the Literature
Source: PubMed Central journal article supplement — Dermatol Ther (Heidelb). 2022 Nov 23;13(1):51–76. doi: 10.1007/s13555-022-00855-2 (PMC9823193; doi:10.1007/s13555-022-00855-2), 2022-11-23
Supplement: 13555_2022_855_MOESM1_ESM.pdf [file 13555_2022_855_MOESM1_ESM.pdf]

Title: **Dermoscopy of bacterial, viral and fungal skin infections: a systematic review of the literature**

Short title: **Dermoscopy of bacterial, viral and fungal infections**

Payal Chauhan,<sup>1</sup> MD, DNB, MNAMS; Dilip Meena,<sup>2</sup> MD; Enzo Errichetti,<sup>3</sup> MD.

*<sup>1</sup>Department of Dermatology, All India Institute of Medical Sciences (AIIMS), Himachal Pradesh, India; <sup>2</sup>Department of Dermatology, Teerthanker Mahaveer Medical College and Research Centre, Moradabad, Uttar Pradesh India; <sup>3</sup>Institute of Dermatology, Department of Medicine, University of Udine, Udine, Italy.*

Address correspondence and reprint requests to:

Enzo Errichetti [Tel: (+39) 0432559822. E-mail: enzoerri@yahoo.it]

Institute of Dermatology, “Santa Maria della Misericordia” University Hospital.

Piazzale Santa Maria della Misericordia, 15. 33100-Udine, Italy

Supplemental Table. Analytical summary of published study and dermoscopic features about bacterial, viral and fungal skin infections

| <b>Dermatoses</b>      | <b>Studies (First author, year and corresponding reference)</b> | <b>Dermoscopic findings (prevalence in percentage)</b>                                                                                                                                                                                                                                      | <b>Corresponding terminology based on <i>International Dermoscopy Society</i> consensus paper</b>                                                                                                       | <b>Histological correlates</b>                                                                                                                                                                                      | <b>Dermoscopic setting (polarized or not/magnification)</b> | <b>Cases (n)</b> | <b>Type of study</b> | <b>Level of evidence</b> |
|------------------------|-----------------------------------------------------------------|---------------------------------------------------------------------------------------------------------------------------------------------------------------------------------------------------------------------------------------------------------------------------------------------|---------------------------------------------------------------------------------------------------------------------------------------------------------------------------------------------------------|---------------------------------------------------------------------------------------------------------------------------------------------------------------------------------------------------------------------|-------------------------------------------------------------|------------------|----------------------|--------------------------|
| Leprosy                |                                                                 |                                                                                                                                                                                                                                                                                             |                                                                                                                                                                                                         |                                                                                                                                                                                                                     |                                                             |                  |                      |                          |
| Borderline tuberculoid | Ankad B, <i>et al.</i> 2017 <sup>13</sup>                       | <ul style="list-style-type: none"> <li>- White areas (100%)</li> <li>- Decreased density of hairs (NS)</li> <li>- Yellow globules (66.7%)</li> <li>- Decreased white dots (50%)</li> <li>- Branching vessels (33.3%)</li> </ul>                                                             | <ul style="list-style-type: none"> <li>- White structureless areas</li> <li>- NA</li> <li>- Yellow globules</li> <li>- NA</li> <li>- Linear vessels with branches</li> </ul>                            | <ul style="list-style-type: none"> <li>- NS</li> <li>- NS</li> <li>- NS</li> <li>- NS</li> <li>- NS</li> </ul>                                                                                                      | Polarized-nonpolarized/NS                                   | 12               | CS                   | V                        |
|                        | Vinay K, <i>et al.</i> 2019 <sup>11</sup>                       | <ul style="list-style-type: none"> <li>- Structureless yellowish-orange areas (NS)</li> <li>- Branching and anastomosing vessels</li> <li>- Paucity of appendageal structures</li> <li>- Diminished pigment network</li> </ul>                                                              | <ul style="list-style-type: none"> <li>- Yellow structureless areas</li> <li>- Linear vessels with branches</li> <li>- NA</li> <li>- NA</li> </ul>                                                      | <ul style="list-style-type: none"> <li>- Dermal granulomas</li> <li>- Increased dermal vasculature</li> <li>- NS</li> <li>- NS</li> </ul>                                                                           | Polarized/x10                                               | 12               | CS                   | V                        |
|                        | Chopra A, <i>et al.</i> 2019 <sup>15</sup>                      | <ul style="list-style-type: none"> <li>- White areas (NS)</li> <li>- Partial loss of hair follicles (NS)</li> <li>- Yellow globules (NS)</li> <li>- Absence of white dots (NS)</li> <li>- Lack of blood vessels (NS)</li> </ul>                                                             | <ul style="list-style-type: none"> <li>- White structureless areas</li> <li>- NA</li> <li>- Yellow globules</li> <li>- NA</li> <li>- NA</li> </ul>                                                      | <ul style="list-style-type: none"> <li>- Eccrine gland openings</li> <li>- NS</li> <li>- Sebaceous units in absence of hair follicles</li> <li>- NS</li> <li>- NS</li> </ul>                                        | Polarized-nonpolarized/x16                                  | 10               | CS                   | V                        |
|                        | Mohta A, <i>et al.</i> 2021 <sup>14</sup>                       | <ul style="list-style-type: none"> <li>- Yellowish-orange structureless areas</li> <li>- Small branching vessels</li> <li>- Patchy loss of pigment network</li> <li>- Diminished appendages</li> <li>- Yellow dots and globules</li> <li>- Violaceous to erythematous background</li> </ul> | <ul style="list-style-type: none"> <li>- Yellow/orange structureless areas</li> <li>- Linear vessels with branches</li> <li>- NA</li> <li>- NA</li> <li>- Yellow dots/globules</li> <li>- NA</li> </ul> | <ul style="list-style-type: none"> <li>- Elongated dermal granuloma</li> <li>- Vascular dilation</li> <li>- NS</li> <li>- Periappendageal granuloma</li> <li>- Pilosebaceous unit dilation</li> <li>- NS</li> </ul> | Polarized-nonpolarized/x10                                  | 29               | CS                   | V                        |
| Tuberculoid            | Vinay K, <i>et al.</i> 2019 <sup>11</sup>                       | <ul style="list-style-type: none"> <li>- Central yellowish white structureless areas (NS)</li> <li>- Surrounding zone of erythema</li> </ul>                                                                                                                                                | <ul style="list-style-type: none"> <li>- Yellow/white structureless areas</li> <li>- NA</li> </ul>                                                                                                      | <ul style="list-style-type: none"> <li>- Dermal granuloma</li> <li>- Increased and dilated blood vessels</li> </ul>                                                                                                 | Polarized/x10                                               | 2                | CS                   | V                        |

|                        |                                            |                                                                                                                                                                                                                                                                                                                                      |                                                                                                                                                                                  |                                                                                                                                                                                                                              |                            |    |    |   |
|------------------------|--------------------------------------------|--------------------------------------------------------------------------------------------------------------------------------------------------------------------------------------------------------------------------------------------------------------------------------------------------------------------------------------|----------------------------------------------------------------------------------------------------------------------------------------------------------------------------------|------------------------------------------------------------------------------------------------------------------------------------------------------------------------------------------------------------------------------|----------------------------|----|----|---|
| Borderline lepromatous | Mohta A, <i>et al.</i> 2021 <sup>14</sup>  | <ul style="list-style-type: none"> <li>- Linear branching vessels</li> <li>- Broken pigmentary network</li> <li>- Lesional loss of hair follicles and eccrine gland openings</li> </ul>                                                                                                                                              | <ul style="list-style-type: none"> <li>- Linear vessels with branches</li> <li>- NA</li> <li>- NA</li> </ul>                                                                     | <ul style="list-style-type: none"> <li>- NS</li> <li>- NS</li> <li>- NS</li> </ul>                                                                                                                                           | Polarized-nonpolarized/x10 | 4  | CS | V |
|                        | Vinay K, <i>et al.</i> 2019 <sup>11</sup>  | <ul style="list-style-type: none"> <li>- Orangish yellow areas (NS)</li> <li>- White structureless areas</li> <li>- Peripheral erythema</li> <li>- Telangiectatic vessels</li> <li>- Moderate loss of hair follicles, absence of white dots, relative sparing of vellus hair</li> <li>- Extensive loss of pigment network</li> </ul> | <ul style="list-style-type: none"> <li>- Yellow/orange structureless area</li> <li>- White structureless area</li> <li>- NA</li> <li>- NA</li> <li>- NA</li> <li>- NA</li> </ul> | <ul style="list-style-type: none"> <li>- Dermal granulomas</li> <li>- Dermal granulomas</li> <li>- NS</li> <li>- Dilated peripheral vessels</li> <li>- Periappendageal granuloma</li> <li>- Damage to melanocytes</li> </ul> |                            |    |    |   |
|                        | Mohta A, <i>et al.</i> 2021 <sup>14</sup>  | <ul style="list-style-type: none"> <li>- Broken and loss of pigmentary network (NS)</li> <li>- Linear chrysalis like structures</li> <li>- Relative paucity of appendages and hair follicles</li> </ul>                                                                                                                              | <ul style="list-style-type: none"> <li>- NA</li> <li>- NA</li> <li>- NA</li> </ul>                                                                                               | <ul style="list-style-type: none"> <li>- NS</li> <li>- NS</li> <li>- NS</li> </ul>                                                                                                                                           |                            |    |    |   |
| Lepromatous            | Mohta A, <i>et al.</i> 2021 <sup>14</sup>  | <ul style="list-style-type: none"> <li>- Loss of pigment network with focal areas of hyperpigmentation (NS)</li> <li>- White shiny streaks</li> <li>- Relative sparing of appendages</li> </ul>                                                                                                                                      | <ul style="list-style-type: none"> <li>- NA</li> <li>- NA</li> <li>- NA</li> </ul>                                                                                               | <ul style="list-style-type: none"> <li>- Dermal granuloma</li> <li>- NS</li> <li>- NS</li> </ul>                                                                                                                             | Polarized-nonpolarized/x10 | 19 | CS | V |
|                        | Vinay K, <i>et al.</i> 2019 <sup>11</sup>  | <ul style="list-style-type: none"> <li>- Yellowish-orange areas (NS)</li> <li>- Dilated branching vessels</li> <li>- Diminished hair follicles with preserved eccrine ducts</li> </ul>                                                                                                                                               | <ul style="list-style-type: none"> <li>- Structureless yellow/orange areas</li> <li>- Linear vessels with branches</li> <li>- NS</li> </ul>                                      | <ul style="list-style-type: none"> <li>- NS</li> <li>- NS</li> <li>- NS</li> </ul>                                                                                                                                           |                            |    |    |   |
|                        | Miola AC, <i>et al.</i> 2020 <sup>17</sup> | <ul style="list-style-type: none"> <li>- Diffuse yellow coloration (100%)</li> <li>- Discrete brownish halo in the center (100%)</li> <li>- Scarring nacreous center (100%)</li> </ul>                                                                                                                                               | <ul style="list-style-type: none"> <li>- Structureless yellow areas</li> <li>- NA</li> <li>- NA</li> </ul>                                                                       | <ul style="list-style-type: none"> <li>- Xanthomization of Virchow cells</li> <li>- NS</li> <li>- NS</li> </ul>                                                                                                              | NS/NS                      | 1  | CR | V |

|                 |                                            |                                                                                                                                                                                                                                                                                                                                                 |                                                                                                                                                                                                                   |                                                                                                                                                                                                                           |                            |    |    |   |
|-----------------|--------------------------------------------|-------------------------------------------------------------------------------------------------------------------------------------------------------------------------------------------------------------------------------------------------------------------------------------------------------------------------------------------------|-------------------------------------------------------------------------------------------------------------------------------------------------------------------------------------------------------------------|---------------------------------------------------------------------------------------------------------------------------------------------------------------------------------------------------------------------------|----------------------------|----|----|---|
| Type 1 reaction | Kansal N, <i>et al.</i> 2020 <sup>16</sup> | <ul style="list-style-type: none"> <li>- Heteromorphic telangiectasias more concentrated peripherally (100%)</li> <li>- Diffuse reddish-brown background (100%)</li> <li>- Multiple ill-defined orange-brown globules at places (100%)</li> <li>- Central whitish streaks (100%)</li> <li>- Multiple arborizing vessels in periphery</li> </ul> | <ul style="list-style-type: none"> <li>- Peripheral linear vessels with branches</li> <li>- NA</li> <li>- Orange/Brown globules</li> <li>- NA</li> <li>- Peripheral linear vessels with branches</li> </ul>       | <ul style="list-style-type: none"> <li>- Vascular ectasia</li> <li>- NS</li> <li>- NS</li> <li>- Whorled arrangement of histiocytes</li> <li>- NS</li> </ul>                                                              | Polarized/x10              | 1  | CR | V |
|                 | Chopra A, <i>et al.</i> 2019 <sup>15</sup> | <ul style="list-style-type: none"> <li>- Patchy xerosis (NS)</li> <li>- White scaling (NS)</li> <li>- Hypotrichosis (NS)</li> </ul>                                                                                                                                                                                                             | <ul style="list-style-type: none"> <li>- NA</li> <li>- White scales</li> <li>- NA</li> </ul>                                                                                                                      | <ul style="list-style-type: none"> <li>- Loss of skin appendages and epidermal atrophy</li> <li>- NS</li> <li>- NS</li> </ul>                                                                                             | Polarized-nonpolarized/x16 | 10 | CS | V |
|                 | Mohta A, <i>et al.</i> 2021 <sup>14</sup>  | <ul style="list-style-type: none"> <li>- Yellowish orange structureless areas (NS)</li> <li>- Shiny skin</li> <li>- Yellowish globules</li> <li>- Sparse appendages</li> <li>- Accentuation of normal reticular pigment</li> <li>- Xerosis</li> </ul>                                                                                           | <ul style="list-style-type: none"> <li>- Yellow orange structureless areas</li> <li>- NA</li> <li>- Yellow globules</li> <li>- NA</li> <li>- NA</li> <li>- NA</li> </ul>                                          | <ul style="list-style-type: none"> <li>- Dermal granuloma, loosely formed, diffuse</li> <li>- Epidermal atrophy</li> <li>- Periadenexal inflammation</li> <li>- Increased melanin in basal layer</li> <li>- NS</li> </ul> | Polarized-nonpolarized/x10 | 17 | CS | V |
|                 | Vinay K, <i>et al.</i> 2019 <sup>11</sup>  | <ul style="list-style-type: none"> <li>- Greyish white semi-adherent scales (NS)</li> <li>- Prominent keratinous plugs</li> </ul>                                                                                                                                                                                                               | <ul style="list-style-type: none"> <li>- White scales</li> <li>- Follicular plugs</li> </ul>                                                                                                                      | <ul style="list-style-type: none"> <li>- Lesional hyperkeratosis</li> <li>- NS</li> </ul>                                                                                                                                 | Polarized/x10              | 3  | CS | V |
|                 | Jha AK, <i>et al.</i> 2020 <sup>18</sup>   | <ul style="list-style-type: none"> <li>- Yellowish-orange areas (42.85%)</li> <li>- Reddish-orange areas (57.14%)</li> <li>- Vessels: arborizing, fine short linear (71.4%), linear blurry (28.57%)</li> <li>- White scales (7.14%)</li> <li>- White structureless areas (NS)</li> </ul>                                                        | <ul style="list-style-type: none"> <li>- Yellow/orange structureless areas</li> <li>- NA</li> <li>- Vessels: linear, linear with branches</li> <li>- White scales</li> <li>- White structureless areas</li> </ul> | <ul style="list-style-type: none"> <li>- NS</li> <li>- NS</li> <li>- NS</li> <li>- NS</li> <li>- NS</li> </ul>                                                                                                            | Polarized/x10              | 14 | CS | V |

|                 |                                            |                                                                                                                                                                                                                                                                                                                                                                  |                                                                                                                                                                                 |                                                                                                                                                                                                                                            |                            |    |    |   |
|-----------------|--------------------------------------------|------------------------------------------------------------------------------------------------------------------------------------------------------------------------------------------------------------------------------------------------------------------------------------------------------------------------------------------------------------------|---------------------------------------------------------------------------------------------------------------------------------------------------------------------------------|--------------------------------------------------------------------------------------------------------------------------------------------------------------------------------------------------------------------------------------------|----------------------------|----|----|---|
| Type 2 reaction | Chopra A, <i>et al.</i> 2019 <sup>15</sup> | <ul style="list-style-type: none"> <li>- Diffuse erythematous background (NS)</li> <li>- Branching telangiectatic vessels (NS)</li> <li>- Sparse hair follicles (NS)</li> <li>- Scaling (NS)</li> </ul>                                                                                                                                                          | <ul style="list-style-type: none"> <li>- NA</li> <li>- Linear vessels with branches</li> <li>- NA</li> <li>- NA</li> </ul>                                                      | <ul style="list-style-type: none"> <li>- NS</li> <li>- NS</li> <li>- NS</li> <li>- NS</li> </ul>                                                                                                                                           | Polarized-nonpolarized/x16 | 10 | CS | V |
|                 | Mohta A, <i>et al.</i> 2021 <sup>14</sup>  | <ul style="list-style-type: none"> <li>- Intense erythema (NS)</li> <li>- Large telangiectatic vessels</li> <li>- Scaling: triangular, star shaped silvery white</li> <li>- Follicular plugs</li> <li>- White globules</li> <li>- Accentuation of normal skin markings</li> <li>- Violaceous to brown perifollicular and periappendageal pigmentation</li> </ul> | <ul style="list-style-type: none"> <li>- NA</li> <li>- NA</li> <li>- White scaling</li> <li>- Follicular plugs</li> <li>- White globules</li> <li>- NA</li> <li>- NA</li> </ul> | <ul style="list-style-type: none"> <li>- Inflammation around dermal granulomas</li> <li>- Vascular dilation</li> <li>- Hyperkeratosis</li> <li>- Hyperkeratosis</li> <li>- Dermal edema</li> <li>- Hyperkeratosis</li> <li>- NS</li> </ul> | Polarized-nonpolarized/x10 | 7  | CS | V |
|                 | Vinay K, <i>et al.</i> 2019 <sup>11</sup>  | <ul style="list-style-type: none"> <li>- Blanching erythema (NS)</li> <li>- Vascular structures</li> </ul>                                                                                                                                                                                                                                                       | <ul style="list-style-type: none"> <li>- NA</li> <li>- NA</li> </ul>                                                                                                            | <ul style="list-style-type: none"> <li>- NS</li> </ul>                                                                                                                                                                                     | Polarized/x10              | 3  | CS | V |
|                 | Chopra A, <i>et al.</i> 2019 <sup>15</sup> | <ul style="list-style-type: none"> <li>- Branching blood vessels</li> <li>- Hyperpigmentation</li> <li>- Scaling and xerosis</li> </ul>                                                                                                                                                                                                                          | <ul style="list-style-type: none"> <li>- Linear vessels with branches</li> <li>- NA</li> <li>- NA</li> </ul>                                                                    | <ul style="list-style-type: none"> <li>- NS</li> </ul>                                                                                                                                                                                     | Polarized-nonpolarized/x16 | 10 | CS | V |
|                 | Mohta A, <i>et al.</i> 2021 <sup>14</sup>  | <ul style="list-style-type: none"> <li>- Increased erythema (NS)</li> <li>- Vascular dilation (NS)</li> <li>- Red dots (NS)</li> <li>- BL and LL dermatoscopic features</li> </ul>                                                                                                                                                                               | <ul style="list-style-type: none"> <li>- NA</li> <li>- NA</li> <li>- NA</li> </ul>                                                                                              | <ul style="list-style-type: none"> <li>- Marked vascularity</li> <li>- NS</li> <li>- NS</li> <li>- Loosely formed granuloma</li> </ul>                                                                                                     | Polarized-nonpolarized/x10 | 9  | CS | V |
| Histoid leprosy | Ankad B, <i>et al.</i> 2017 <sup>19</sup>  | <ul style="list-style-type: none"> <li>- Structureless white areas (100%)</li> <li>- Rim of brownish hyperpigmentation (100%)</li> <li>- Linear branching vessels (100%)</li> </ul>                                                                                                                                                                              | <ul style="list-style-type: none"> <li>- Structureless white areas</li> <li>- NA</li> <li>- Linear vessels with branches</li> </ul>                                             | <ul style="list-style-type: none"> <li>- Whorled arrangement of spindle-shaped histiocytes in the granuloma</li> <li>- Color of the skin type</li> <li>- NS</li> </ul>                                                                     | Polarized/NS               | 1  | CR | V |

|                                                     |                                                                                                                                                                                                                                                                                                                                                                                                                         |                                                                                                                                                                                                                                                    |                                                                                                                                                                                                                                                                                            |                            |   |    |   |
|-----------------------------------------------------|-------------------------------------------------------------------------------------------------------------------------------------------------------------------------------------------------------------------------------------------------------------------------------------------------------------------------------------------------------------------------------------------------------------------------|----------------------------------------------------------------------------------------------------------------------------------------------------------------------------------------------------------------------------------------------------|--------------------------------------------------------------------------------------------------------------------------------------------------------------------------------------------------------------------------------------------------------------------------------------------|----------------------------|---|----|---|
| Vinay K, <i>et al.</i> 2019 <sup>11</sup>           | <ul style="list-style-type: none"> <li>- Well circumscribed dome shaped yellowish brown nodules (NS)</li> <li>- Crown vessels over the margin</li> </ul>                                                                                                                                                                                                                                                                | <ul style="list-style-type: none"> <li>- Yellow structureless areas</li> <li>- Peripheral linear vessels with branches</li> </ul>                                                                                                                  | <ul style="list-style-type: none"> <li>- NS</li> </ul>                                                                                                                                                                                                                                     | Polarized/x10              | 2 | CS | V |
| Acharya P, <i>et al.</i> 2019 <sup>20</sup>         | <ul style="list-style-type: none"> <li>- Shiny white structures (100%): shiny white area, crystalline lines, and rosettes</li> <li>- Vessels: linear branching vessels (100%) and hairpin vessels (25%)</li> <li>- Yellowish-brown to pink background (NS)</li> <li>- Orange-yellow areas (100%)</li> <li>- Perilesional brown pigmentation (75%)</li> <li>- Scaling (50%)</li> <li>- Follicular plugs (50%)</li> </ul> | <ul style="list-style-type: none"> <li>- NA</li> <li>- Linear vessels with branches, linear curved vessels</li> <li>- NA</li> <li>- Yellow/orange structureless areas</li> <li>- NA</li> <li>- White scales</li> <li>- Follicular plugs</li> </ul> | <ul style="list-style-type: none"> <li>- Fibrotic dermal changes</li> <li>- Upward displacement of the dilated vessels by underlying granulomas</li> <li>- NS</li> <li>- Dermal granuloma</li> <li>- Colour of hyperpigmented skin type</li> <li>- Hyperkeratosis</li> <li>- NS</li> </ul> | Polarized/x10              | 4 | CS | V |
| Mathur M, <i>et al.</i> 2019 <sup>21</sup>          | <ul style="list-style-type: none"> <li>- Central whitish-yellow structureless area (100%)</li> <li>- Peripheral hyperpigmentation (100%)</li> <li>- Crown vessels (100%)</li> </ul>                                                                                                                                                                                                                                     | <ul style="list-style-type: none"> <li>- NA</li> <li>- NA</li> <li>- Linear vessels with branches</li> </ul>                                                                                                                                       | <ul style="list-style-type: none"> <li>- NS</li> <li>- NS</li> <li>- NS</li> </ul>                                                                                                                                                                                                         | NS/NS                      | 1 | CR | V |
| Abadias-Granado I, <i>et al.</i> 2020 <sup>22</sup> | <ul style="list-style-type: none"> <li>- Yellowish-orange structureless areas (100%)</li> <li>- Shiny white structures (100%)</li> <li>- Peripheral hyperpigmentation (100%)</li> <li>- Vessels: crown, linear branching (100%)</li> </ul>                                                                                                                                                                              | <ul style="list-style-type: none"> <li>- Yellow/orange structureless areas</li> <li>- NA</li> <li>- NA</li> <li>- Linear vessels with branches</li> </ul>                                                                                          | <ul style="list-style-type: none"> <li>- Dermal granulomas</li> <li>- Fibrous tissue strands</li> <li>- Prototype of patient</li> <li>- Upward displacement of vessels by underlying granulomas</li> </ul>                                                                                 | Polarized/x10              | 1 | CR | V |
| Mohta A, <i>et al.</i> 2021 <sup>14</sup>           | <ul style="list-style-type: none"> <li>- Yellowish orange structureless areas (NS)</li> <li>- Central hypopigmented, blanchable dome-shaped structures (NS)</li> </ul>                                                                                                                                                                                                                                                  | <ul style="list-style-type: none"> <li>- Yellow/orange structureless area</li> <li>- NA</li> </ul>                                                                                                                                                 | <ul style="list-style-type: none"> <li>- Expansile granuloma with spindle-shaped cells</li> <li>- NS</li> </ul>                                                                                                                                                                            | Polarized-nonpolarized/x10 | 4 | CS | V |

|                            |                                                |                                                                                                                                                                                                                                                                                                                           |                                                                                                                                                |                                                                                                                                                                       |               |   |    |   |
|----------------------------|------------------------------------------------|---------------------------------------------------------------------------------------------------------------------------------------------------------------------------------------------------------------------------------------------------------------------------------------------------------------------------|------------------------------------------------------------------------------------------------------------------------------------------------|-----------------------------------------------------------------------------------------------------------------------------------------------------------------------|---------------|---|----|---|
|                            |                                                | <ul style="list-style-type: none"> <li>- Crystalline lines, shiny white areas (NS)</li> <li>- Crown vessels (NS)</li> <li>- Central umbilication with central white dots and keratotic plugs (NS)</li> <li>- Perilesional hyperpigmentation (NS)</li> </ul>                                                               | <ul style="list-style-type: none"> <li>- NA</li> <li>- Linear vessels with branches</li> <li>- NA</li> <li>- NA</li> </ul>                     | <ul style="list-style-type: none"> <li>- Dermal fibrosis</li> <li>- Upwardly displaced dilated vessels</li> <li>- Transepidermal elimination</li> <li>- NS</li> </ul> |               |   |    |   |
| Syphilis                   |                                                |                                                                                                                                                                                                                                                                                                                           |                                                                                                                                                |                                                                                                                                                                       |               |   |    |   |
| Condyloma lata             | Ikeda E, <i>et al.</i> 2016 <sup>26</sup>      | <ul style="list-style-type: none"> <li>- Red to milky-red globules at periphery and glomerular vessels in the center (100%)</li> <li>- Whitish-pink network on the raised border (100%)</li> <li>- Yellowish structureless areas at periphery and multiple white, small, round structures in the center (100%)</li> </ul> | <ul style="list-style-type: none"> <li>- Peripheral dotted vessels</li> <li>- NA</li> <li>- Yellow structureless areas at periphery</li> </ul> | <ul style="list-style-type: none"> <li>- Vascular dilation</li> <li>- Prominent acanthosis</li> <li>- Macerated horny layer and keratin plugs</li> </ul>              | NS/NS         | 1 | CR | V |
| Palmo-plantar syphiloderm  | Tognetti L, <i>et al.</i> 2017 <sup>23</sup>   | <ul style="list-style-type: none"> <li>- Diffuse, yellowish red background (100%)</li> <li>- Diffuse monomorphic dotted and glomerular vessels (100%)</li> <li>- Circular, scaling edge in outward direction surrounded by erythematous halo (100%)</li> </ul>                                                            | <ul style="list-style-type: none"> <li>- Orange structureless areas</li> <li>- Uniform dotted vessels</li> <li>- Specific clue</li> </ul>      | <ul style="list-style-type: none"> <li>- NS</li> <li>- NS</li> <li>- NS</li> </ul>                                                                                    | NS/NS         | 1 | CR | V |
|                            | Errichetti E, <i>et al.</i> 2017 <sup>24</sup> | <ul style="list-style-type: none"> <li>- Orangish background 100%)</li> <li>- Thin, annular whitish scaling edge progressing outward with surrounding erythematous halo (100%)</li> <li>- Peripheral, vaguely telangiectatic vessels (100%)</li> </ul>                                                                    | <ul style="list-style-type: none"> <li>- Orange structureless areas</li> <li>- Specific clue</li> <li>- NA</li> </ul>                          | <ul style="list-style-type: none"> <li>- Dermal hemosiderin deposition</li> <li>- NS</li> <li>- NS</li> </ul>                                                         | Polarized/x10 | 1 | CR | V |
| Penile annular syphiloderm | Li FG, <i>et al.</i> 2020 <sup>27</sup>        | <ul style="list-style-type: none"> <li>- Peripheral, dotted and short linear vessels (100%)</li> <li>- White scaling (100%)</li> <li>- Clear central area (100%)</li> </ul>                                                                                                                                               | <ul style="list-style-type: none"> <li>- Peripheral, dotted and linear vessels</li> <li>- Peripheral white scales</li> <li>- NA</li> </ul>     | <ul style="list-style-type: none"> <li>- NS</li> <li>- NS</li> <li>- NS</li> </ul>                                                                                    | Polarized/x30 | 1 | CR | V |

|                    |                                               |                                                                                                                                                                                                                                                                                                                                          |                                                                                                                                                                                                                                  |                                                                                                                                                                                                                                                                                                                                                                                   |               |    |    |    |
|--------------------|-----------------------------------------------|------------------------------------------------------------------------------------------------------------------------------------------------------------------------------------------------------------------------------------------------------------------------------------------------------------------------------------------|----------------------------------------------------------------------------------------------------------------------------------------------------------------------------------------------------------------------------------|-----------------------------------------------------------------------------------------------------------------------------------------------------------------------------------------------------------------------------------------------------------------------------------------------------------------------------------------------------------------------------------|---------------|----|----|----|
| Secondary syphilis | Wang Q, <i>et al.</i> 2021 <sup>28</sup>      | <ul style="list-style-type: none"> <li>- Linear-irregular, hairpin vessels (100%)</li> <li>- White scales (100%)</li> <li>- Whitish/yellowish background (100%)</li> </ul>                                                                                                                                                               | <ul style="list-style-type: none"> <li>- Linear curved vessels</li> <li>- Patchy, white scales</li> <li>- Yellow structureless areas</li> </ul>                                                                                  | <ul style="list-style-type: none"> <li>- NS</li> <li>- NS</li> <li>- NS</li> </ul>                                                                                                                                                                                                                                                                                                | NS/x60        | 1  | CR | V  |
|                    | Mathur M, <i>et al.</i> 2019 <sup>25</sup>    | <ul style="list-style-type: none"> <li>- Scaling within skin furrows (100%)</li> <li>- Peripheral scaling with relatively clear central area (100%)</li> <li>- Central, ill-defined darker area fading towards periphery (100%)</li> <li>- Orange color (100%)</li> </ul>                                                                | <ul style="list-style-type: none"> <li>- White scales</li> <li>- Specific clue</li> <li>- NA</li> <li>- Orange structureless area</li> </ul>                                                                                     | <ul style="list-style-type: none"> <li>- NS</li> <li>- NS</li> <li>- NS</li> <li>- NS</li> </ul>                                                                                                                                                                                                                                                                                  | Polarized/x20 | 1  | CR | V  |
| Lupus vulgaris     | Brasiello M, <i>et al.</i> 2009 <sup>29</sup> | <ul style="list-style-type: none"> <li>- Orange yellowish areas (100%)</li> <li>- Linear branching vessels (100%)</li> <li>- White reticular streaks (50%)</li> <li>- Milia-like cysts (50%)</li> </ul>                                                                                                                                  | <ul style="list-style-type: none"> <li>- Yellow/orange structureless areas</li> <li>- Linear vessels with branches</li> <li>- NA</li> <li>- Yellow dots</li> </ul>                                                               | <ul style="list-style-type: none"> <li>- NS</li> <li>- NS</li> <li>- NS</li> <li>- NS</li> </ul>                                                                                                                                                                                                                                                                                  | NS/NS         | 4  | CS | V  |
|                    | Lallas A, <i>et al.</i> 2014 <sup>30</sup>    | <ul style="list-style-type: none"> <li>- Orange yellowish areas (93.8%)</li> <li>- Linear branching vessels (100%)</li> <li>- White scales (25%)</li> <li>- Pigmentation structures (12.5%)</li> <li>- Follicular plugs (6.2%)</li> </ul>                                                                                                | <ul style="list-style-type: none"> <li>- Yellow/orange structureless areas</li> <li>- Linear vessels with branches</li> <li>- White scales</li> <li>- NA</li> <li>- Follicular plugs</li> </ul>                                  | <ul style="list-style-type: none"> <li>- Granulomas</li> <li>- NS</li> <li>- NS</li> <li>- NS</li> <li>- NS</li> </ul>                                                                                                                                                                                                                                                            | NS/x10        | 16 | CC | IV |
|                    | Bombonato C, <i>et al.</i> 2015 <sup>31</sup> | <ul style="list-style-type: none"> <li>- Orange yellowish areas (100%)</li> <li>- Linear branching vessels (100%)</li> </ul>                                                                                                                                                                                                             | <ul style="list-style-type: none"> <li>- Yellow structureless areas</li> <li>- Linear vessels with branches</li> </ul>                                                                                                           | <ul style="list-style-type: none"> <li>- Dermal granulomas</li> <li>- NS</li> </ul>                                                                                                                                                                                                                                                                                               | NS/NS         | 1  | CR | V  |
|                    | Ankad BS, <i>et al.</i> 2020 <sup>32</sup>    | <ul style="list-style-type: none"> <li>- Yellowish-white globules (100%)</li> <li>- Pinkish-red background (100%)</li> <li>- Reddish globules (84.21%)</li> <li>- Vessels (84.21%): dotted and linear</li> <li>- Ulceration (26.3%)</li> <li>- White structureless areas (100%)</li> <li>- Scaling-white/yellow scales (100%)</li> </ul> | <ul style="list-style-type: none"> <li>- Yellow/white globules</li> <li>- NA</li> <li>- NA</li> <li>- Dotted and linear vessels</li> <li>- NA</li> <li>- White structureless areas</li> <li>- White and yellow scales</li> </ul> | <ul style="list-style-type: none"> <li>- Dermal granulomas</li> <li>- Widespread vasodilatation</li> <li>- Tips of ectatic papillary loops</li> <li>- Tips of normal vertical papillary loops and ectatic subpapillary capillary plexus</li> <li>- Epidermal, dermal erosions</li> <li>- Acanthosis and dermal fibrosis</li> <li>- Hyperkeratosis and/or parakeratosis</li> </ul> | Polarized/x10 | 19 | CS | V  |



|                                        |                                                                                           |                                                                                                                                                                                                                                                                                                                                                                                                                                                                                                           |                                                                                                                                                                                                                                                                                                                                               |                                                                                                                                                                                                                                                 |                                     |            |              |            |
|----------------------------------------|-------------------------------------------------------------------------------------------|-----------------------------------------------------------------------------------------------------------------------------------------------------------------------------------------------------------------------------------------------------------------------------------------------------------------------------------------------------------------------------------------------------------------------------------------------------------------------------------------------------------|-----------------------------------------------------------------------------------------------------------------------------------------------------------------------------------------------------------------------------------------------------------------------------------------------------------------------------------------------|-------------------------------------------------------------------------------------------------------------------------------------------------------------------------------------------------------------------------------------------------|-------------------------------------|------------|--------------|------------|
|                                        |                                                                                           | <ul style="list-style-type: none"> <li>- White shiny streaks (31.5%)</li> <li>- Follicular plugs (21.05%)</li> <li>- Patulous follicles (15.7%)</li> <li>- Bluish hue (10.5%)</li> </ul>                                                                                                                                                                                                                                                                                                                  | <ul style="list-style-type: none"> <li>- White lines</li> <li>- Follicular plugs</li> <li>- NA</li> <li>- Blue structureless areas</li> </ul>                                                                                                                                                                                                 | <ul style="list-style-type: none"> <li>- Orientation of collagen bundles in different angles in the dermis</li> <li>- Keratotic material in follicular infundibulum</li> <li>- Infundibulum dilatation</li> <li>- Orthokeratosis</li> </ul>     |                                     |            |              |            |
| Tuberculosis verrucosa cutis           | Jakhar D, <i>et al.</i> 2021 <sup>34</sup>                                                | <ul style="list-style-type: none"> <li>- Yellowish to reddish background (100%)</li> <li>- Papillated surface (100%)</li> <li>- Dirty white thick scales (100%)</li> <li>- Yellow orange globular areas (100%)</li> <li>- Irregularly dilated vessels (100%)</li> </ul>                                                                                                                                                                                                                                   | <ul style="list-style-type: none"> <li>- Yellowish structureless areas</li> <li>- NA</li> <li>- White scales</li> <li>- Yellow/orange globules</li> <li>- NA</li> </ul>                                                                                                                                                                       | <ul style="list-style-type: none"> <li>- Epithelioid cell granuloma</li> <li>- Papillomatosis</li> <li>- Hyperkeratosis</li> <li>- Epithelioid cell granuloma</li> <li>- Cytokine release, reactive oxygen species, and angiogenesis</li> </ul> | Polarized/x10-x50                   | 1          | CR           | V          |
| Lichen scrofulosorum                   | Jassi R, <i>et al.</i> 2020 <sup>35</sup><br><br>Garg T, <i>et al.</i> 2021 <sup>36</sup> | <ul style="list-style-type: none"> <li>- Pale round monomorphic grouped perifollicular dots (100%)</li> <li>- Central brown follicular plug (100%)</li> <li>- Marginal rim of fine white scaling (50%)</li> <li>- Extensive scaling (50%)</li> <li>- Marginal hyperpigmentation (50%)</li> <li>- Follicular and perifollicular lesions (100%)</li> <li>- Central brown clod(100%)</li> <li>- Halo of pallor (100%)</li> <li>- Telangiectasis (100%)</li> <li>- Rim of fine white scales (100%)</li> </ul> | <ul style="list-style-type: none"> <li>- Perifollicular white colour</li> <li>- Follicular plug</li> <li>- Peripheral white scales</li> <li>- Diffuse white scales</li> <li>- Perifollicular hyperpigmentation</li> <li>- NA</li> <li>- NA</li> <li>- Perifollicular white colour</li> <li>- NA</li> <li>- Peripheral white scales</li> </ul> | <ul style="list-style-type: none"> <li>- Granulomatous infiltration in the perifollicular lesion</li> <li>- NS</li> </ul>       | Polarized/x10<br><br>Polarized/x170 | 2<br><br>1 | CR<br><br>CR | V<br><br>V |
| <i>Mycobacterium marinum</i> infection | Conforti C, <i>et al.</i> 2019 <sup>37</sup>                                              | <ul style="list-style-type: none"> <li>- Whitish area (50%)</li> <li>- Surrounding erythematous background (50%)</li> <li>- Purplish background (50%)</li> <li>- Multiple structured orangish rounded areas</li> <li>- Crown-shaped looped vessels (50%)</li> <li>- Fine scaling (50%)</li> </ul>                                                                                                                                                                                                         | <ul style="list-style-type: none"> <li>- White structureless areas</li> <li>- NA</li> <li>- Purple structureless areas</li> <li>- Orange structureless areas</li> <li>- Linear vessels with branches</li> <li>- NA</li> </ul>                                                                                                                 | <ul style="list-style-type: none"> <li>- NS</li> <li>- NS</li> <li>- NS</li> <li>- Tuberculoid granuloma in the dermis</li> <li>- NS</li> <li>- NS</li> </ul>                                                                                   | NS/NS                               | 1          | CR           | V          |

|                                      |                                                      |                                                                                                                                                                                                                                                                |                                                                                                        |                                                                                                                                                                                                        |               |    |    |    |
|--------------------------------------|------------------------------------------------------|----------------------------------------------------------------------------------------------------------------------------------------------------------------------------------------------------------------------------------------------------------------|--------------------------------------------------------------------------------------------------------|--------------------------------------------------------------------------------------------------------------------------------------------------------------------------------------------------------|---------------|----|----|----|
|                                      |                                                      | <ul style="list-style-type: none"> <li>- Dotted vessels (50%)</li> <li>- Orange-whitish central areas with looped concentric vessels (50%)</li> </ul>                                                                                                          | <ul style="list-style-type: none"> <li>- Dotted vessels</li> <li>- NA</li> </ul>                       | <ul style="list-style-type: none"> <li>- NS</li> <li>- NS</li> </ul>                                                                                                                                   |               |    |    |    |
| Peruvian wart                        | Durand D, <i>et al.</i> 2017 <sup>38</sup>           | <ul style="list-style-type: none"> <li>- Vascular component</li> <li>- Circular scale (NS)</li> <li>- Vascular component with central depression (NS)</li> </ul>                                                                                               | <ul style="list-style-type: none"> <li>- NA</li> <li>- Peripheral white scale</li> <li>- NA</li> </ul> | <ul style="list-style-type: none"> <li>- NS</li> <li>- NS</li> <li>- NS</li> </ul>                                                                                                                     | NS/NS         | 1  | CR | V  |
| Staphylococcal scalded skin syndrome | Miyashita K, <i>et al.</i> 2016 <sup>39</sup>        | <ul style="list-style-type: none"> <li>- Skin exfoliation still having an epidermis with less leachate (100%)</li> </ul>                                                                                                                                       | <ul style="list-style-type: none"> <li>- NA</li> </ul>                                                 | <ul style="list-style-type: none"> <li>- NS</li> </ul>                                                                                                                                                 | NS/NS         | 1  | CR | V  |
| Pitted keratolysis                   | Lockwood LL, <i>et al.</i> 2010 <sup>40</sup>        | <ul style="list-style-type: none"> <li>- Multiple 2-3 mm crater-like shallow pits having heterogeneous architecture (100%)</li> </ul>                                                                                                                          | <ul style="list-style-type: none"> <li>- NA</li> </ul>                                                 | <ul style="list-style-type: none"> <li>- NS</li> </ul>                                                                                                                                                 | NS/x10        | 1  | CR | V  |
|                                      | Pattanaprichakul P, <i>et al.</i> 2021 <sup>41</sup> | <ul style="list-style-type: none"> <li>- Pits of various sizes and configuration (88.1%)</li> <li>- Interrupted dermatoglyphic lines (89.2%)</li> <li>- Bead sign (21.6%)</li> <li>- White opaques (23.8%)</li> <li>- Black or brown opaques (7.1%)</li> </ul> | <ul style="list-style-type: none"> <li>- NA</li> <li>- NA</li> <li>- NA</li> <li>- NA</li> </ul>       | <ul style="list-style-type: none"> <li>- Defects in stratum corneum</li> <li>- Defects in stratum corneum</li> <li>- Presence of bacteria</li> <li>- Parakeratosis</li> <li>- Parakeratosis</li> </ul> | NS/NS         | 42 | CS | V  |
| Folliculitis                         |                                                      |                                                                                                                                                                                                                                                                |                                                                                                        |                                                                                                                                                                                                        |               |    |    |    |
| Common folliculitis                  | Durdu M, <i>et al.</i> 2019 <sup>42</sup>            | <ul style="list-style-type: none"> <li>- Central round pustule (50.9%)</li> <li>- Peripheral sparse dotted vessels (50.9%)</li> </ul>                                                                                                                          | <ul style="list-style-type: none"> <li>- NA</li> <li>- Peripheral dotted vessels</li> </ul>            | <ul style="list-style-type: none"> <li>- NS</li> <li>- NS</li> </ul>                                                                                                                                   | NS/NS         | 55 | CC | IV |
| Pseudomonas folliculitis             | Errichetti E, <i>et al.</i> 2016 <sup>43</sup>       | <ul style="list-style-type: none"> <li>- Pinkish background (100%)</li> <li>- Paler centre</li> <li>- Central vellus hair (100%)</li> </ul>                                                                                                                    | <ul style="list-style-type: none"> <li>- NA</li> <li>- NA</li> <li>- NA</li> </ul>                     | <ul style="list-style-type: none"> <li>- NS</li> <li>- Remarkable edema</li> <li>- NS</li> </ul>                                                                                                       | Polarized/x10 | 1  | CR | V  |
| Trichobacteriosis                    | Guiotoku MM, <i>et al.</i> 2012 <sup>44</sup>        | <ul style="list-style-type: none"> <li>- Waxy and yellowish adherent nodules and concretions (flame like) localised along the entire length of the hair of the axilla (100%)</li> </ul>                                                                        | <ul style="list-style-type: none"> <li>- NA</li> </ul>                                                 | <ul style="list-style-type: none"> <li>- NS</li> </ul>                                                                                                                                                 | Polarized/x10 | 1  | CR | V  |
|                                      | Salim G, <i>et al.</i> 2014 <sup>45</sup>            | <ul style="list-style-type: none"> <li>- Waxy and yellowish adherent nodules and concretions localised along the entire length of the hair of the axilla, with a global aspect</li> </ul>                                                                      | <ul style="list-style-type: none"> <li>- NA</li> </ul>                                                 | <ul style="list-style-type: none"> <li>- NS</li> </ul>                                                                                                                                                 | NS/NS         | 1  | CR | V  |

|               |                                                        |                                                                                                                                                                                                                                            |                                                                                  |                                                                                                                             |               |   |    |   |
|---------------|--------------------------------------------------------|--------------------------------------------------------------------------------------------------------------------------------------------------------------------------------------------------------------------------------------------|----------------------------------------------------------------------------------|-----------------------------------------------------------------------------------------------------------------------------|---------------|---|----|---|
|               | Rojas Mora, <i>et al.</i> 2016 <sup>46</sup>           | <ul style="list-style-type: none"> <li>- of a flame, skewer or plume (100%)</li> <li>- Soft, yellowish-white, irregular masses around the hairs, some forming white concretions with a brush-like or feathery appearance (100%)</li> </ul> | <ul style="list-style-type: none"> <li>- NA</li> </ul>                           | <ul style="list-style-type: none"> <li>- NS</li> </ul>                                                                      | NS/NS         | 1 | CR | V |
|               | Almazán-Fernández FM, <i>et al.</i> 2017 <sup>47</sup> | <ul style="list-style-type: none"> <li>- White-yellowish concretions on the hair shafts (100%)</li> </ul>                                                                                                                                  | <ul style="list-style-type: none"> <li>- NA</li> </ul>                           | <ul style="list-style-type: none"> <li>- NS</li> </ul>                                                                      | Polarized/x10 | 1 | CR | V |
|               | Larrondo J, <i>et al.</i> 2017 <sup>48</sup>           | <ul style="list-style-type: none"> <li>- Multiple yellow-creamy concretions (100%)</li> </ul>                                                                                                                                              | <ul style="list-style-type: none"> <li>- NA</li> </ul>                           | <ul style="list-style-type: none"> <li>- NS</li> </ul>                                                                      | Polarized/x10 | 1 | CR | V |
|               | Gupta V, <i>et al.</i> 2018 <sup>49</sup>              | <ul style="list-style-type: none"> <li>- Golden yellow concretions encasing several hair shafts (100%)</li> </ul>                                                                                                                          | <ul style="list-style-type: none"> <li>- NA</li> </ul>                           | <ul style="list-style-type: none"> <li>- NS</li> </ul>                                                                      | Polarized/x10 | 1 | CR | V |
|               | Lacarrubba F, <i>et al.</i> 2019 <sup>50</sup>         | <ul style="list-style-type: none"> <li>- Waxy and yellowish/whitish adherent aggregates forming a sheath surrounding the axillary hair shaft (100%)</li> </ul>                                                                             | <ul style="list-style-type: none"> <li>- NA</li> </ul>                           | <ul style="list-style-type: none"> <li>- NS</li> </ul>                                                                      | Polarized/x10 | 2 | CR | V |
| Warts         |                                                        |                                                                                                                                                                                                                                            |                                                                                  |                                                                                                                             |               |   |    |   |
| Genital Warts | Ozdemir F, <i>et al.</i> 2008 <sup>59</sup>            | <ul style="list-style-type: none"> <li>- Brain like pattern: Exophytic papillary structures (some with jet black pigmentation) (100%)</li> <li>- Red dots (some surrounded by a whitish halo) (100%)</li> </ul>                            | <ul style="list-style-type: none"> <li>- NA</li> <li>- Dotted vessels</li> </ul> | <ul style="list-style-type: none"> <li>- Haemorrhages in parakeratotic column (black pigmentation)</li> <li>- NS</li> </ul> | NS/NS         | 1 | CR | V |
|               | Kim SH, <i>et al.</i> 2009 <sup>51</sup>               | <ul style="list-style-type: none"> <li>- Multiple, irregular projections with tapering ends arising from a common base (100%)</li> <li>- Conglomerate vascular structures (100%)</li> </ul>                                                | <ul style="list-style-type: none"> <li>- NA</li> <li>- NA</li> </ul>             | <ul style="list-style-type: none"> <li>- Hyperkeratosis and acanthosis</li> <li>- NS</li> </ul>                             | NS/NS         | 1 | CR | V |
|               | Watanabe T, <i>et al.</i> 2010 <sup>52</sup>           | <ul style="list-style-type: none"> <li>- Papillomatous, irregular projections outlined by a peripheral whitish band (25%)</li> </ul>                                                                                                       | <ul style="list-style-type: none"> <li>- NA</li> </ul>                           | <ul style="list-style-type: none"> <li>- NS</li> </ul>                                                                      | NS/NS         | 1 | CR | V |



|            |                                                    |                                                                                                                                                                                                                                                                      |                                                                                                                                              |                                                                                                              |                  |                          |    |    |
|------------|----------------------------------------------------|----------------------------------------------------------------------------------------------------------------------------------------------------------------------------------------------------------------------------------------------------------------------|----------------------------------------------------------------------------------------------------------------------------------------------|--------------------------------------------------------------------------------------------------------------|------------------|--------------------------|----|----|
| Flat warts | Veasey JV, <i>et al.</i> 2014 <sup>55</sup>        | <ul style="list-style-type: none"> <li>- Finger-like pattern (50%)</li> <li>- Knob-like pattern (50%)</li> <li>- Rough aspect in both patterns (100%)</li> <li>- Glomerular vessels at the tip of many projections (100%)</li> </ul>                                 | <ul style="list-style-type: none"> <li>- NA</li> <li>- NA</li> <li>- NA</li> <li>- Dotted vessels</li> </ul>                                 | <ul style="list-style-type: none"> <li>- NS</li> <li>- NS</li> <li>- Papillomatosis</li> <li>- NS</li> </ul> | Polarized/NS     | 2                        | CS | V  |
|            | Jiang S, <i>et al.</i> 2017 <sup>56</sup>          | <ul style="list-style-type: none"> <li>- Papillary excrescences (100%)</li> <li>- Vascular characteristics (100%)</li> </ul>                                                                                                                                         | <ul style="list-style-type: none"> <li>- NA</li> <li>- NA</li> </ul>                                                                         | <ul style="list-style-type: none"> <li>- NS</li> </ul>                                                       | NS/NS            | 1                        | CS | V  |
|            | Zhang Y, <i>et al.</i> 2018 <sup>61</sup>          | <ul style="list-style-type: none"> <li>- Papillary warts (75%)</li> <li>- Flat warts (25%)</li> <li>- Vessels: punctate (99.1%), dendritic (24.5%), polymorphic (83.2%), curved (16.4%), annular (24.5%), and hairpin-like (22.7%)</li> </ul>                        | <ul style="list-style-type: none"> <li>- NA</li> <li>- NA</li> <li>- Dotted, linear with branches, and linear-curved vessels</li> </ul>      | <ul style="list-style-type: none"> <li>- NS</li> </ul>                                                       | NS/NS            | 136 patients/220 lesions | CS | V  |
|            | Campos MA, <i>et al.</i> 2018 <sup>60</sup>        | <ul style="list-style-type: none"> <li>- Grayish dots (100%)</li> <li>- Surrounded white halo (100%)</li> <li>- Blue-white structureless background (100%)</li> </ul>                                                                                                | <ul style="list-style-type: none"> <li>- Grey dots</li> <li>- NA</li> <li>- Blue-white structureless area</li> </ul>                         | <ul style="list-style-type: none"> <li>- NS</li> <li>- NS</li> <li>- NS</li> </ul>                           | NS/NS            | 1                        | CR | V  |
|            | García-Lozano JA, <i>et al.</i> 2020 <sup>58</sup> | <ul style="list-style-type: none"> <li>- Looped vessels along major filiform axis of wart (70%)</li> <li>- Combined vascular features: looped-coiled (30%), dotted-coiled (20%)</li> </ul>                                                                           | <ul style="list-style-type: none"> <li>- Linear-curved vessels</li> <li>- Combination of linear-curved vessels</li> </ul>                    | <ul style="list-style-type: none"> <li>- NS</li> <li>- NS</li> </ul>                                         | NS/NS            | 10                       | CS | V  |
|            | Seong SH, <i>et al.</i> 2021 <sup>57</sup>         | <ul style="list-style-type: none"> <li>- Exophytic papillary appearance: finger-like (50%), knob-like (38.9%), mosaic (5.6%), cerebriform (5.6%)</li> <li>- Whitish halos (94.4%)</li> <li>- Vessels: Hairpin (66.7%), dotted (22.2%), glomerular (22.2%)</li> </ul> | <ul style="list-style-type: none"> <li>- NA</li> <li>- NA</li> <li>- NA</li> <li>- Vessels: linear-curved and dotted</li> </ul>              | <ul style="list-style-type: none"> <li>- NS</li> <li>- NS</li> <li>- NS</li> <li>- NS</li> </ul>             | NS/x10           | 18                       | CC | IV |
|            | Vázquez-López F, <i>et al.</i> 2004 <sup>63</sup>  | <ul style="list-style-type: none"> <li>- Dots/globular vessels (60%)</li> </ul>                                                                                                                                                                                      | <ul style="list-style-type: none"> <li>- Dotted vessels</li> </ul>                                                                           | <ul style="list-style-type: none"> <li>- NS</li> </ul>                                                       | Nonpolarized/x10 | 5                        | CS | V  |
|            | Kim WJ, <i>et al.</i> 2015 <sup>64</sup>           | <ul style="list-style-type: none"> <li>- Even-colored light brown to yellow patch (94.1%)</li> <li>- Comedo-like openings (5.9%)</li> <li>- Dots/globular vessels (47.1%)</li> </ul>                                                                                 | <ul style="list-style-type: none"> <li>- Yellow to brown structureless area</li> <li>- Follicular plugs</li> <li>- Dotted vessels</li> </ul> | <ul style="list-style-type: none"> <li>- NS</li> </ul>                                                       | NS/NS            | 17                       | CC | IV |

|                    |                                                 |                                                                                                                                                                                                                                               |                                                                                                                                                  |                                                                                                                                |               |                        |    |   |
|--------------------|-------------------------------------------------|-----------------------------------------------------------------------------------------------------------------------------------------------------------------------------------------------------------------------------------------------|--------------------------------------------------------------------------------------------------------------------------------------------------|--------------------------------------------------------------------------------------------------------------------------------|---------------|------------------------|----|---|
| Palmoplantar warts | Hui D, <i>et al.</i> 2017 <sup>65</sup>         | <ul style="list-style-type: none"> <li>- Dots or globular vessels (100%)</li> <li>- Light red background (67.3%), light brown to yellow (32.7%)</li> </ul>                                                                                    | <ul style="list-style-type: none"> <li>- Dotted vessels</li> <li>- NA</li> </ul>                                                                 | <ul style="list-style-type: none"> <li>- NS</li> <li>- NS</li> </ul>                                                           | NS/ x20-x50   | 55                     | CS | V |
|                    | Al Rudaisat M, <i>et al.</i> 2021 <sup>66</sup> | <ul style="list-style-type: none"> <li>- Background: red (61%), red-gray (19.2%), whitish/pale (19%)</li> <li>- Vessels: dotted, linear, and bleeding</li> </ul>                                                                              | <ul style="list-style-type: none"> <li>- White and red-gray structureless areas</li> <li>- Vessels: dotted, linear, and NA</li> </ul>            | <ul style="list-style-type: none"> <li>- NS</li> </ul>                                                                         | Polarized/NS  | 26                     | CS | V |
|                    | Agarwal M, <i>et al.</i> 2021 <sup>67</sup>     | <ul style="list-style-type: none"> <li>- Well-defined (40%)</li> <li>- Brown background (100%)</li> <li>- Presence of papillae/surrounding haloes (50%)</li> <li>- Dotted vessels (10%)</li> <li>- Interrupted skin markings (20%)</li> </ul> | <ul style="list-style-type: none"> <li>- NA</li> <li>- Brown structureless area</li> <li>- NA</li> <li>- Dotted vessels</li> <li>- NA</li> </ul> | <ul style="list-style-type: none"> <li>- NS</li> <li>- NS</li> <li>- NS</li> <li>- NS</li> <li>- NS</li> </ul>                 | Polarized/NS  | 10                     | CS | V |
|                    | Lee DY, <i>et al.</i> 2009 <sup>69</sup>        | <ul style="list-style-type: none"> <li>- Black or red dots (100%)</li> </ul>                                                                                                                                                                  | <ul style="list-style-type: none"> <li>- NA</li> </ul>                                                                                           | <ul style="list-style-type: none"> <li>- NS</li> </ul>                                                                         | Polarized/x30 | 1                      | CR | V |
|                    | Tanioka M, <i>et al.</i> 2009 <sup>70</sup>     | <ul style="list-style-type: none"> <li>- Waved hyperkeratosis (100%)</li> <li>- Tiny dotted vessels</li> <li>- Light brownish background</li> <li>- Pigmented parallel ridge pattern</li> </ul>                                               | <ul style="list-style-type: none"> <li>- NA</li> <li>- Dotted vessels</li> <li>- Brown structureless area</li> <li>- NA</li> </ul>               | <ul style="list-style-type: none"> <li>- NS</li> <li>- NS</li> <li>- NS</li> <li>- NS</li> </ul>                               | NS/NS         | 1                      | CR | V |
|                    | Arpaia, <i>et al.</i> 2009 <sup>75</sup>        | <ul style="list-style-type: none"> <li>- Parallel ridge pattern</li> </ul>                                                                                                                                                                    | <ul style="list-style-type: none"> <li>- NA</li> </ul>                                                                                           | <ul style="list-style-type: none"> <li>- NS</li> </ul>                                                                         | NS/x20        | 1                      | CR | V |
|                    | Bae JM, <i>et al.</i> 2009 <sup>71</sup>        | <ul style="list-style-type: none"> <li>- Homogenous black to red dots and globules (100%)</li> <li>- Papilliform surface (100%) or interrupted skin lines (100%)</li> <li>- Red linear vessels after trimming (NS)</li> </ul>                 | <ul style="list-style-type: none"> <li>- NA</li> <li>- NA</li> <li>- Linear vessels</li> </ul>                                                   | <ul style="list-style-type: none"> <li>- NS</li> <li>- NS</li> <li>- NS</li> </ul>                                             | NS/x10        | 38 patients/98 lesions | CS | V |
|                    | Kaçar N, <i>et al.</i> 2013 <sup>76</sup>       | <ul style="list-style-type: none"> <li>- Pigmented parallel ridge pattern</li> </ul>                                                                                                                                                          | <ul style="list-style-type: none"> <li>- NA</li> </ul>                                                                                           | <ul style="list-style-type: none"> <li>- NS</li> </ul>                                                                         | NS/x10        | 1                      | CR | V |
|                    | Quast DR, <i>et al.</i> 2017 <sup>72</sup>      | <ul style="list-style-type: none"> <li>- Multiple, pinhead-sized bleedings, coiled vessels</li> </ul>                                                                                                                                         | <ul style="list-style-type: none"> <li>- Dotted, linear-curved vessels</li> </ul>                                                                | <ul style="list-style-type: none"> <li>- NS</li> </ul>                                                                         | NS/NS         | 7                      | CS | V |
|                    | Nirmal B, <i>et al.</i> 2018 <sup>73</sup>      | <ul style="list-style-type: none"> <li>- Regularly distributed black dots and globules (100%)</li> </ul>                                                                                                                                      | <ul style="list-style-type: none"> <li>- NA</li> </ul>                                                                                           | <ul style="list-style-type: none"> <li>- Thrombosis and haemorrhages resulting from dilated vessels within the wart</li> </ul> | NS/NS         | 1                      | CR | V |

|  |                                                 |                                                                                                                                                                                                                                                                                                                                        |                                                                                            |                              |                  |     |    |   |
|--|-------------------------------------------------|----------------------------------------------------------------------------------------------------------------------------------------------------------------------------------------------------------------------------------------------------------------------------------------------------------------------------------------|--------------------------------------------------------------------------------------------|------------------------------|------------------|-----|----|---|
|  |                                                 | - Surrounding white halo interrupting the dermatoglyphic pattern of palm: falooda seed appearance (100%)                                                                                                                                                                                                                               | - NA                                                                                       | - NA                         |                  |     |    |   |
|  | Barkat MT, <i>et al.</i> 2018 <sup>74</sup>     | - Yellow structureless pattern (NS)<br>- Black dots (NS)                                                                                                                                                                                                                                                                               | - Yellow structureless area<br>- NA                                                        | - NS<br>- Thrombosed vessels | NS/x6            | 46  | CS | V |
|  | Albalat W, <i>et al.</i> 2020 <sup>77</sup>     | - Well defined papilliform surface (NS)<br>- Multiple prominent haemorrhages (NS)<br>- Tiny dotted vessels (NS)<br>- Brownish background (NS)                                                                                                                                                                                          | - NA<br>- Purple dots<br>- Dotted vessels<br>- Brown structureless area                    | - NS<br>- NS<br>- NS<br>- NS | NS/NS            | 130 | CS | V |
|  | Al Rudaisat M, <i>et al.</i> 2021 <sup>66</sup> | Palmar wart<br>- Papillomatous (63%)<br>- Frogspawn appearance (44.4%)<br>- Yellow-gray structureless (11.1%)<br>- Vessels: Dotted (25.9%), linear (11.1%), bleeding (63%)<br>Plantar wart<br>- Papillomatous (60%)<br>- Frogspawn (44%)<br>- Yellow-gray structureless (40%)<br>- Vessels: Dotted (28%), linear (16%), bleeding (76%) | - NA<br>- NA<br>- Yellow-gray structureless area<br>- Vessels: dotted, linear              | - NS<br>- NS<br>- NS<br>- NS | Polarized/NS     | 27  | CS | V |
|  | Agarwal M, <i>et al.</i> 2021 <sup>67</sup>     | - Well-defined (95%)<br>- Background: Yellow (45%), Brown (30%), and pink (25%)<br>- Presence of papillae/surrounding haloes (55%)<br>- Dotted vessels (60%), globules (25%), and linear vessels (15%)<br>- Interrupted skin markings (100%)<br>- Haemorrhage/crusting (10%)                                                           | - NA<br>- Yellow, brown structureless areas<br>- NA<br>- Dotted vessels and linear vessels | - NS<br>- NS<br>- NS<br>- NS | Polarized/NS     | 25  | CS | V |
|  | Hassan SNE, <i>et al.</i> 2021 <sup>78</sup>    | - Well-defined yellowish papilliform surface (77%)<br>- Dotted haemorrhages (95.8%)<br>- Interrupted skin lines (100%)                                                                                                                                                                                                                 | - NA<br>- Brown dots<br>- NA                                                               | - NS<br>- NS<br>- NS         | Nonpolarized/x10 | 20  | CS | V |
|  |                                                 |                                                                                                                                                                                                                                                                                                                                        |                                                                                            |                              |                  | 48  | CS | V |

|                                 |                                                 |                                                                                                                                                                                                                                                                                                                                                                                                                                                                                            |                                                                                                                                                                                                         |                                                                                                                                            |              |                        |    |   |
|---------------------------------|-------------------------------------------------|--------------------------------------------------------------------------------------------------------------------------------------------------------------------------------------------------------------------------------------------------------------------------------------------------------------------------------------------------------------------------------------------------------------------------------------------------------------------------------------------|---------------------------------------------------------------------------------------------------------------------------------------------------------------------------------------------------------|--------------------------------------------------------------------------------------------------------------------------------------------|--------------|------------------------|----|---|
| Common warts (Verruca vulgaris) | Yoong C, <i>et al.</i> 2009 <sup>79</sup>       | <ul style="list-style-type: none"> <li>- Mosaic pattern (100%)</li> <li>- Red dotted, looped, coiled vessels (100%)</li> <li>- Shiny white background (100%)</li> <li>- Haemorrhagic crust (100%)</li> </ul>                                                                                                                                                                                                                                                                               | <ul style="list-style-type: none"> <li>- NA</li> <li>- Dotted and linear-curved vessels</li> <li>- White structureless area</li> <li>- NA</li> </ul>                                                    | <ul style="list-style-type: none"> <li>- NS</li> <li>- Apical capillaries in papillary dermis</li> <li>- NS</li> <li>- NS</li> </ul>       | Polarized/NS | 1                      | CR | V |
|                                 | Li X, <i>et al.</i> 2017 <sup>80</sup>          | <ul style="list-style-type: none"> <li>- Mosaic pattern (67.21%)</li> <li>- Exophytic keratotic projection (29.51%): finger-like (14.75%), filiform (11.48%), cone (3.28%)</li> <li>- Knob (4.91%)</li> <li>- Daisy flower pattern (1.64%)</li> <li>- Nonspecific pattern (6.56%)</li> <li>- Vascular structures: dotted (85.25%), linear (27.87%), hairpin (21.31%), coiled (9.84%)</li> <li>- Keratosis: white or yellow network or circle (62.30), white projection (18.03%)</li> </ul> | <ul style="list-style-type: none"> <li>- NA</li> <li>- NA</li> <li>- NA</li> <li>- NA</li> <li>- NA</li> <li>- Vessels: dotted, linear, and linear-curved</li> <li>- Scales: white or yellow</li> </ul> | <ul style="list-style-type: none"> <li>- NS</li> <li>- NS</li> <li>- NS</li> <li>- NS</li> <li>- NS</li> <li>- NS</li> </ul>               | NS/NS        | 48 patients/61 lesions | CS | V |
|                                 | Veasey JV, <i>et al.</i> 2020 <sup>81</sup>     | <ul style="list-style-type: none"> <li>- Knob-like pattern (projections of similar diameter and length) (50%)</li> <li>- Thrombosed glomerular capillaries (50%)</li> <li>- Unspecific desquamation (50%)</li> </ul> <p><i>Ex-vivo</i> dermoscopy:</p> <ul style="list-style-type: none"> <li>- Papillomatous and dotted haemorrhagic projection in epidermis (50%)</li> <li>- Pigment in superficial dermis (50%)</li> </ul>                                                              | <ul style="list-style-type: none"> <li>- NA</li> <li>- Purple dots</li> <li>- Diffuse white scales</li> <li>- Purple dots</li> <li>- NA</li> </ul>                                                      | <ul style="list-style-type: none"> <li>- NS</li> <li>- Vascular ectasia</li> <li>- NS</li> <li>- Vascular ectasia</li> <li>- NS</li> </ul> | NS/x10-x20   | 2                      | CR | V |
|                                 | Al Rudaisat M, <i>et al.</i> 2021 <sup>66</sup> | <ul style="list-style-type: none"> <li>- Papillomatous (100%)</li> <li>- Frogspawn-like appearance (42.3%)</li> <li>- Finger-like projections (34.6%)</li> <li>- Vessels: dotted (65.8%), linear (65.8%), hairpin-like vessels (15.3%), bleeding (96.1%)</li> </ul>                                                                                                                                                                                                                        | <ul style="list-style-type: none"> <li>- NA</li> <li>- NA</li> <li>- Dotted and linear vessels</li> </ul>                                                                                               | <ul style="list-style-type: none"> <li>- NS</li> <li>- NS</li> <li>- NS</li> <li>- NS</li> </ul>                                           | Polarized/NS | 26                     | CS | V |



|                       |                                                 |                                                                                                                                                                                                                                                                                                                                                                                 |                                                                                                                                                                                              |                                                                                                                                                                                                               |                   |    |    |   |
|-----------------------|-------------------------------------------------|---------------------------------------------------------------------------------------------------------------------------------------------------------------------------------------------------------------------------------------------------------------------------------------------------------------------------------------------------------------------------------|----------------------------------------------------------------------------------------------------------------------------------------------------------------------------------------------|---------------------------------------------------------------------------------------------------------------------------------------------------------------------------------------------------------------|-------------------|----|----|---|
|                       | Agarwal M, <i>et al.</i> 2021 <sup>67</sup>     | <ul style="list-style-type: none"> <li>- Well-defined (90%)</li> <li>- Background: Yellow (23.23%), brown (43.33%), pink (33.33%)</li> <li>- Presence of papillae/surrounding haloes (21%)</li> <li>- Dotted vessels (33.33%), globules (16.67%), linear (13.33%), loop (6.67%)</li> <li>- Interrupted skin markings (30%)</li> <li>- Haemorrhages/crusting (13.33%)</li> </ul> | <ul style="list-style-type: none"> <li>- NA</li> <li>- Yellow/brown structureless area</li> <li>- NA</li> <li>- Dotted, linear, linear-curved vessels</li> <li>- NA</li> <li>- NA</li> </ul> | <ul style="list-style-type: none"> <li>- NS</li> <li>- NS</li> <li>- NS</li> <li>- NS</li> <li>- NS</li> <li>- NS</li> </ul>                                                                                  | Polarized/NS      | 30 | CS | V |
|                       | Hassan SNE, <i>et al.</i> 2021 <sup>78</sup>    | <ul style="list-style-type: none"> <li>- Grouped papillae (100%)</li> <li>- Dotted or looped vessels (43.75%)</li> <li>- Irregularly distributed haemorrhagic dots or lines (43.75%)</li> <li>- White halo surrounding vessels (15.6%)</li> </ul>                                                                                                                               | <ul style="list-style-type: none"> <li>- NA</li> <li>- Dotted or linear-curved vessels</li> <li>- Brown dots</li> <li>- NA</li> </ul>                                                        | <ul style="list-style-type: none"> <li>- NS</li> <li>- NS</li> <li>- NS</li> <li>- NS</li> </ul>                                                                                                              | Nonpolarized/x10  | 32 | CS | V |
| Molluscum contagiosum | Morales A, <i>et al.</i> 2005 <sup>82</sup>     | <ul style="list-style-type: none"> <li>- White-yellow polyglobular amorphous structures in centre (100%)</li> <li>- Crown vessels (100%)</li> </ul>                                                                                                                                                                                                                             | <ul style="list-style-type: none"> <li>- White structureless area</li> <li>- Linear vessels with branches</li> </ul>                                                                         | <ul style="list-style-type: none"> <li>- Inverted lobules of hyperplastic squamous epithelium expanding into dermis separated by fine septae of compressed dermis</li> <li>- Vessels in the dermis</li> </ul> | NS/NS             | 3  | CS | V |
|                       | Vázquez-López, <i>et al.</i> 2004 <sup>63</sup> | <ul style="list-style-type: none"> <li>- Red corona (66.7%)</li> </ul>                                                                                                                                                                                                                                                                                                          | <ul style="list-style-type: none"> <li>- Linear vessels with branches</li> </ul>                                                                                                             | <ul style="list-style-type: none"> <li>- NS</li> </ul>                                                                                                                                                        | Non-polarized/x10 | 15 | CS | V |
|                       | Zaballos P, <i>et al.</i> 2006 <sup>83</sup>    | <ul style="list-style-type: none"> <li>- Polylobular whitish amorphous structure in the centre (100%)</li> <li>- Surrounding crown vessels (100%)</li> </ul>                                                                                                                                                                                                                    | <ul style="list-style-type: none"> <li>- White structureless area</li> <li>- Linear vessels with branches</li> </ul>                                                                         | <ul style="list-style-type: none"> <li>- Lobulated, endophytic epidermal hyperplasia with intracytoplasmic inclusion bodies</li> <li>- Dilated vessels in dermis</li> </ul>                                   | NS/x10            | 1  | CR | V |
|                       | Panasiti V, <i>et al.</i> 2008 <sup>93</sup>    | <ul style="list-style-type: none"> <li>- Small, whitish discoid area in the center (white target pattern) (100%)</li> <li>- Hairpin vessels in the periphery (100%)</li> </ul>                                                                                                                                                                                                  | <ul style="list-style-type: none"> <li>- White structureless area</li> <li>- Peripheral linear-curved vessels</li> </ul>                                                                     | <ul style="list-style-type: none"> <li>- NS</li> <li>- NS</li> </ul>                                                                                                                                          | NS/NS             | 1  | CR | V |

|  |                                                      |                                                                                                                                                                                                                                                                                                                                                                                                                 |                                                                                                                                                                                         |                                                                                                                       |                  |                         |    |   |
|--|------------------------------------------------------|-----------------------------------------------------------------------------------------------------------------------------------------------------------------------------------------------------------------------------------------------------------------------------------------------------------------------------------------------------------------------------------------------------------------|-----------------------------------------------------------------------------------------------------------------------------------------------------------------------------------------|-----------------------------------------------------------------------------------------------------------------------|------------------|-------------------------|----|---|
|  | Micali G, <i>et al.</i> 2011 <sup>53</sup>           | <ul style="list-style-type: none"> <li>- Polyglobular, yellowish-white, amorphous structure in the centre (100%)</li> </ul>                                                                                                                                                                                                                                                                                     | <ul style="list-style-type: none"> <li>- White structureless area</li> </ul>                                                                                                            | <ul style="list-style-type: none"> <li>- Presence of enlarged cells containing intracytoplasmic inclusions</li> </ul> | NS/x50           | 1                       | CR | V |
|  | Inahez M, <i>et al.</i> 2011 <sup>84</sup>           | <ul style="list-style-type: none"> <li>- Surrounding crown of linear, fine, sometimes blurred vessels, some of them branching (100%)</li> <li>- Orifice (96.68%)</li> <li>- Vessels (89.1%): crown (22.7%), punctiform (14.7%), radial (8.1%), and mixed (45.74%) [mixed crown and radial pattern (21.8%), flower petal vascular pattern (17.5%), crown+punctiform (2.4%), radial+punctiform (0.9%)]</li> </ul> | <ul style="list-style-type: none"> <li>- Linear vessels with branching</li> <li>- NA</li> <li>- Vessels: linear vessels with branches, dotted vessels, linear-curved vessels</li> </ul> | <ul style="list-style-type: none"> <li>- Dilated vessels</li> <li>- NS</li> <li>- NS</li> </ul>                       | Nonpolarized/x10 | 57 patients/211 lesions | CS | V |
|  | Alfaro-Castellón P, <i>et al.</i> 2012 <sup>96</sup> | <ul style="list-style-type: none"> <li>- Polylobular, white-yellow, amorphous center (100%)</li> <li>- Crown of hairpin vessels in the periphery (100%)</li> <li>- Hardened, central umbilicated core (100%)</li> </ul>                                                                                                                                                                                         | <ul style="list-style-type: none"> <li>- White structureless area</li> <li>- Peripheral linear-curved vessels</li> <li>- NA</li> </ul>                                                  | <ul style="list-style-type: none"> <li>- NS</li> <li>- NS</li> <li>- NS</li> </ul>                                    | NS/NS            | 1                       | CR | V |
|  | Mun J, <i>et al.</i> 2013 <sup>97</sup>              | <ul style="list-style-type: none"> <li>- Multiple, shiny, white clods</li> </ul>                                                                                                                                                                                                                                                                                                                                | <ul style="list-style-type: none"> <li>- White structureless areas</li> </ul>                                                                                                           | <ul style="list-style-type: none"> <li>- Molluscum bodies in epidermis</li> </ul>                                     | Polarized/NS     | 1                       | CR | V |
|  | Kuh SH, <i>et al.</i> 2015 <sup>85</sup>             | <ul style="list-style-type: none"> <li>- White structure (97.3%)- roundish (34.1%), polylobular (26.7%), fourleaf clover-like (22.5%), non-specific (14%)</li> <li>- Vessels (91.1%): crown (49.6%), punctiform (7.4%), radial (4.3%), crown+radial (21.7%); crown+punctiform (5%), radial+punctiform (3.1%)</li> </ul>                                                                                         | <ul style="list-style-type: none"> <li>- White structureless area</li> <li>- Linear vessel with branches, dotted vessels, and linear-curved vessels</li> </ul>                          | <ul style="list-style-type: none"> <li>- Inverted lobules of acanthotic epidermis</li> <li>- NS</li> </ul>            | NS/NS            | 258 lesions             | CS | V |
|  | Zhuang K, <i>et al.</i> 2015 <sup>86</sup>           | <ul style="list-style-type: none"> <li>- Smooth, reddish and pink surface with depression in the margin (100%)</li> <li>- Crown vessel (100%)</li> </ul>                                                                                                                                                                                                                                                        | <ul style="list-style-type: none"> <li>- NA</li> <li>- Linear vessel with branches</li> </ul>                                                                                           | <ul style="list-style-type: none"> <li>- NS</li> <li>- NS</li> </ul>                                                  | NS/NS            | 1                       | CR | V |

|                                                 |                                                                                                                                                                                                  |                                                                                                                                                                    |                                                                                                                                                                             |                                |   |    |   |
|-------------------------------------------------|--------------------------------------------------------------------------------------------------------------------------------------------------------------------------------------------------|--------------------------------------------------------------------------------------------------------------------------------------------------------------------|-----------------------------------------------------------------------------------------------------------------------------------------------------------------------------|--------------------------------|---|----|---|
| Uzuncakmak TK, <i>et al.</i> 2016 <sup>87</sup> | <ul style="list-style-type: none"> <li>- White-yellow structureless area in the center of the of lesion</li> <li>- Increased linear vascularity on the periphery (100%)</li> </ul>               | <ul style="list-style-type: none"> <li>- White/yellow structureless area</li> <li>- Peripheral linear vessels with branches</li> </ul>                             | <ul style="list-style-type: none"> <li>- NS</li> <li>- NS</li> </ul>                                                                                                        | NS/NS                          | 1 | CR | V |
| Oya K, <i>et al.</i> 2018 <sup>88</sup>         | <ul style="list-style-type: none"> <li>- Pearly-white amorphous structures (100%)</li> <li>- Surrounding telangiectasia (100%)</li> <li>- Edematous stroma (100%)</li> </ul>                     | <ul style="list-style-type: none"> <li>- White structureless areas</li> <li>- Peripheral linear vessels, linear-curved vessels</li> <li>- NA</li> </ul>            | <ul style="list-style-type: none"> <li>- Molluscum bodies that were located in the centre of endophytic epithelial lobules</li> <li>- NS</li> <li>- NS</li> </ul>           | NS/NS                          | 1 | CR | V |
| Atzori L, <i>et al.</i> 2018 <sup>89</sup>      | <ul style="list-style-type: none"> <li>- Central white to yellow amorphous structures (100%)</li> <li>- Peripheral crown of reddish, linear, or pointed vessels (100%)</li> </ul>                | <ul style="list-style-type: none"> <li>- White structureless area</li> <li>- Peripheral linear or dotted vessels</li> </ul>                                        | <ul style="list-style-type: none"> <li>- NS</li> <li>- NS</li> </ul>                                                                                                        | NS/NS                          | 1 | CR | V |
| Demirdag HG, <i>et al.</i> 2019 <sup>98</sup>   | <ul style="list-style-type: none"> <li>- Multiple white-yellow clods (100%)</li> <li>- Surrounding fine serpentine vessels (100%)</li> </ul>                                                     | <ul style="list-style-type: none"> <li>- White/yellow globules</li> <li>- Linear vessels with branches, peripheral</li> </ul>                                      | <ul style="list-style-type: none"> <li>- Lobulated, endophytic epidermal hyperplasia with intracytoplasmic inclusion bodies</li> <li>- Dilated vessels in dermis</li> </ul> | NS/NS                          | 2 | CR | V |
| Pradhan S, <i>et al.</i> 2019 <sup>94</sup>     | <ul style="list-style-type: none"> <li>- Smooth, shiny clods (swimming goggle appearance) (100%)</li> <li>- Reddish surface (100%)</li> <li>- Coronary vessels without orifice (100%)</li> </ul> | <ul style="list-style-type: none"> <li>- Focal white structureless areas</li> <li>- NA</li> <li>- Linear vessels with branches</li> </ul>                          | <ul style="list-style-type: none"> <li>- NS</li> <li>- NS</li> <li>- NS</li> </ul>                                                                                          | Nonpolarized and polarized/X40 | 1 | CR | V |
| Elmas ÖF, <i>et al.</i> 2020 <sup>90</sup>      | <ul style="list-style-type: none"> <li>- Polylobular, roundish, white to yellow structures (100%)</li> <li>- Punctiform/dotted and serpentine vessels (100%)</li> </ul>                          | <ul style="list-style-type: none"> <li>- Yellow/white focal structureless area</li> <li>- Dotted and linear-curved vessels</li> </ul>                              | <ul style="list-style-type: none"> <li>- NS</li> <li>- NS</li> </ul>                                                                                                        | NS/NS                          | 1 | CR | V |
| Sil A, <i>et al.</i> 2020 <sup>91</sup>         | <ul style="list-style-type: none"> <li>- Roundish white-to-yellow structures (100%)</li> <li>- Peripheral crown and dotted vessels (100%)</li> </ul>                                             | <ul style="list-style-type: none"> <li>- White to yellow focal structureless area</li> <li>- Peripheral linear vessels with branches and dotted vessels</li> </ul> | <ul style="list-style-type: none"> <li>- NS</li> <li>- NS</li> </ul>                                                                                                        | NS/NS                          | 1 | CR | V |

|                                  |                                                        |                                                                                                                                                                                                                                                                                                                                                                                   |                                                                                                                                                                                                                   |                                                                                                                                                                                                                                                                                                                                  |                            |            |    |   |
|----------------------------------|--------------------------------------------------------|-----------------------------------------------------------------------------------------------------------------------------------------------------------------------------------------------------------------------------------------------------------------------------------------------------------------------------------------------------------------------------------|-------------------------------------------------------------------------------------------------------------------------------------------------------------------------------------------------------------------|----------------------------------------------------------------------------------------------------------------------------------------------------------------------------------------------------------------------------------------------------------------------------------------------------------------------------------|----------------------------|------------|----|---|
|                                  | Elmas ÖF, <i>et al.</i> 2020 <sup>99</sup>             | <ul style="list-style-type: none"> <li>- Central yellowish structureless area (100%)</li> <li>- Surrounding thick branched vessels with bulbous ends (100%)</li> </ul>                                                                                                                                                                                                            | <ul style="list-style-type: none"> <li>- Yellowish structureless area</li> <li>- Peripheral vessels with branches</li> </ul>                                                                                      | <ul style="list-style-type: none"> <li>- NS</li> <li>- NS</li> </ul>                                                                                                                                                                                                                                                             | NS/NS                      | 1          | CR | V |
|                                  | Kumar S, <i>et al.</i> 2020 <sup>100</sup>             | <ul style="list-style-type: none"> <li>- Polylobular, pinkish-white, amorphous structure in the centre (100%)</li> <li>- Surrounding crown of vessels that did not cross the centre (100%)</li> </ul>                                                                                                                                                                             | <ul style="list-style-type: none"> <li>- NA</li> <li>- Peripheral linear vessels with branches</li> </ul>                                                                                                         | <ul style="list-style-type: none"> <li>- NS</li> <li>- NS</li> </ul>                                                                                                                                                                                                                                                             | NS/x10                     | 1          | CR | V |
|                                  | Śławińska M, <i>et al.</i> 2020 <sup>101</sup>         | <ul style="list-style-type: none"> <li>- Larger lesions (&gt;5mm): Yellowish globules of different size and random distribution, separated by smaller, oval-shape white globules;</li> <li>- Polymorphic vessels</li> <li>- Smaller lesions: Central yellow globule or white structureless area</li> <li>- Irregular linear vessels of radial arrangement at periphery</li> </ul> | <ul style="list-style-type: none"> <li>- Yellow globules separated by white globules;</li> <li>- NA</li> <li>- Yellow globules or white structureless area</li> <li>- Peripheral linear-curved vessels</li> </ul> | <ul style="list-style-type: none"> <li>- Lobulated, endophytic epidermal hyperplasia</li> <li>- Blood vessels tightly surrounding inverted hyperplastic epidermal lobules</li> <li>- Lobulated, endophytic epidermal hyperplasia</li> <li>- Blood vessels tightly surrounding inverted hyperplastic epidermal lobules</li> </ul> | NS/NS                      | 1          | CR | V |
|                                  | Daruwalla SB, <i>et al.</i> 2020 <sup>95</sup>         | <ul style="list-style-type: none"> <li>- Extraction dermoscopy: White globular molluscum body with overlying crown vessels</li> </ul>                                                                                                                                                                                                                                             | <ul style="list-style-type: none"> <li>- NA</li> </ul>                                                                                                                                                            | <ul style="list-style-type: none"> <li>- NS</li> </ul>                                                                                                                                                                                                                                                                           | Polarized-nonpolarized/x50 | 20 lesions | CS | V |
|                                  | Monteagudo Sánchez B, <i>et al.</i> 2021 <sup>92</sup> | <ul style="list-style-type: none"> <li>- Central rounded yellowish structure (100%)</li> <li>- Peripheral crown branching vessel (1000%)</li> </ul>                                                                                                                                                                                                                               | <ul style="list-style-type: none"> <li>- Yellow structureless area</li> <li>- Peripheral linear vessels with branches</li> </ul>                                                                                  | <ul style="list-style-type: none"> <li>- Inverted lobes of acanthosis epidermis (filled with molluscum bodies)</li> <li>- Peripherally displaced dermal vessels by expanding inverted acanthotic epidermis</li> </ul>                                                                                                            | NS/NS                      | 1          | CR | V |
| Orf nodule (Contagious erythema) | Chavez-Alvarez S, <i>et al.</i> 2016 <sup>104</sup>    | <ul style="list-style-type: none"> <li>- Central crust(100%)</li> <li>- White structureless areas (100%)</li> <li>- White shiny streaks (100%)</li> </ul>                                                                                                                                                                                                                         | <ul style="list-style-type: none"> <li>- NA</li> <li>- White structureless areas</li> <li>- White lines</li> </ul>                                                                                                | <ul style="list-style-type: none"> <li>- NS</li> <li>- NS</li> <li>- NS</li> </ul>                                                                                                                                                                                                                                               | NS/x10                     | 1          | CR | V |



|                 |                                             |                                                                                                                                                                                                                                                                                                                                                                                                                                                                                                                                                                                                |                                                                                                                                                                                                                                                                                                                                              |                                                                                                                                                                                                                  |               |            |    |   |
|-----------------|---------------------------------------------|------------------------------------------------------------------------------------------------------------------------------------------------------------------------------------------------------------------------------------------------------------------------------------------------------------------------------------------------------------------------------------------------------------------------------------------------------------------------------------------------------------------------------------------------------------------------------------------------|----------------------------------------------------------------------------------------------------------------------------------------------------------------------------------------------------------------------------------------------------------------------------------------------------------------------------------------------|------------------------------------------------------------------------------------------------------------------------------------------------------------------------------------------------------------------|---------------|------------|----|---|
|                 | Alnami A, <i>et al.</i> 2018 <sup>107</sup> | <ul style="list-style-type: none"> <li>- Milky red globules in a linear arrangement on the white background (100%)</li> <li>- Lacunas in periphery and milky red globules in non-linear arrangement (100%)</li> <li>- Central ulceration (100%)</li> <li>- Red-pink clods in a linear configuration (100%)</li> <li>- Surrounding white network (100%)</li> </ul>                                                                                                                                                                                                                              | <ul style="list-style-type: none"> <li>- NA</li> <li>- NA</li> <li>- NA</li> <li>- NA</li> <li>- NA</li> </ul>                                                                                                                                                                                                                               | <ul style="list-style-type: none"> <li>- NS</li> <li>- NS</li> <li>- NS</li> <li>- Viral eosinophilic inclusion bodies</li> <li>- Epidermal acanthosis and hypergranulosis</li> </ul>                            | NS/NS         | 1          | CR | V |
| Milker's nodule | Ayhan E, <i>et al.</i> 2017 <sup>102</sup>  | <ul style="list-style-type: none"> <li>- Blue-gray area (35%)</li> <li>- Orange-yellow streaks (19.2%)</li> <li>- Grayish-whitish streaks (26.9%)</li> <li>- Central yellow-white area (35%)</li> <li>- Crust (40%)</li> <li>- Erosion-ulceration (55%)</li> <li>- Yellow-white globule (15%)</li> <li>- Yellow-white ring (35%)</li> <li>- Erythema (100%)</li> <li>- Black dot (55%),</li> <li>- Erythematous ring (75%)</li> <li>- Dotted vessels (60%), comma vessels (15%), polymorphic vessels (15%), glomerular vessels (5%), hairpin vessels (15%), milky-red globule (10%)</li> </ul> | <ul style="list-style-type: none"> <li>- Blue-grey structureless area</li> <li>- Orange lines</li> <li>- White lines</li> <li>- Yellow structureless area</li> <li>- NA</li> <li>- NA</li> <li>- Yellow globule</li> <li>- NA</li> <li>- NA</li> <li>- NA</li> <li>- NA</li> <li>- NA</li> <li>- Dotted and linear-curved vessels</li> </ul> | <ul style="list-style-type: none"> <li>- NS</li> </ul> | NS/x10        | 20 lesions | CR | V |
| Sporotrichosis  | Dabas G, <i>et al.</i> 2019 <sup>109</sup>  | <ul style="list-style-type: none"> <li>- Generalized erythema (100%)</li> <li>- Yellowish structureless areas (100%)</li> <li>- Arborizing telangiectasias (100%)</li> <li>- White scar-like areas (100%)</li> <li>- Clustered pustules at periphery (100%)</li> </ul>                                                                                                                                                                                                                                                                                                                         | <ul style="list-style-type: none"> <li>- NA</li> <li>- Yellowish structureless area</li> <li>- Linear vessels with branches</li> <li>- White structureless areas (focal)</li> <li>- NA</li> </ul>                                                                                                                                            | <ul style="list-style-type: none"> <li>- NS</li> <li>- Granulomatous inflammation</li> <li>- Neoangiogenesis</li> <li>- Scarring and fibrosis</li> <li>- Neutrophilic microabscesses</li> </ul>                  | Polarized/x10 | 1          | CR | V |
|                 | Vinay K, <i>et al.</i> 2020 <sup>108</sup>  | <ul style="list-style-type: none"> <li>- Yellowish-orange areas (100%)</li> <li>- Diffuse blanchable background erythema (100%)</li> <li>- Superficial haemorrhagic crusting (100%)</li> <li>- Superficial ulceration (75%)</li> </ul>                                                                                                                                                                                                                                                                                                                                                         | <ul style="list-style-type: none"> <li>- Yellow-orange structureless areas</li> <li>- NA</li> <li>- NA</li> <li>- NA</li> </ul>                                                                                                                                                                                                              | <ul style="list-style-type: none"> <li>- Dermal granulomas</li> <li>- Ongoing inflammation</li> <li>- NS</li> <li>- NS</li> </ul>                                                                                | Polarized/x10 | 4          | CS | V |

|                         |                                                |                                                                                                                                                                                                                                                                                                                                   |                                                                                                                                                                  |                                                                                                               |            |    |    |   |
|-------------------------|------------------------------------------------|-----------------------------------------------------------------------------------------------------------------------------------------------------------------------------------------------------------------------------------------------------------------------------------------------------------------------------------|------------------------------------------------------------------------------------------------------------------------------------------------------------------|---------------------------------------------------------------------------------------------------------------|------------|----|----|---|
|                         |                                                | <ul style="list-style-type: none"> <li>- Yellow tears (25%)</li> <li>- Radiating white streams (25%)</li> <li>- Linear unfocused vessels (75%)</li> </ul>                                                                                                                                                                         | <ul style="list-style-type: none"> <li>- Follicular plugs</li> <li>- White lines</li> <li>- Linear vessels</li> </ul>                                            | <ul style="list-style-type: none"> <li>- Follicular plugs</li> <li>- Dermal fibrosis</li> <li>- NA</li> </ul> |            |    |    |   |
| Cutaneous blastomycosis | Wang S, <i>et al.</i> 2015 <sup>110</sup>      | <ul style="list-style-type: none"> <li>- Thick, overlapping papillomatous structures with a pink vascular hue (100%)</li> <li>- Haemorrhagic crusting (100%)</li> <li>- Scattered thin plates of scale</li> <li>- Irregular vessels (100%)</li> </ul>                                                                             | <ul style="list-style-type: none"> <li>- NA</li> </ul>                                                                                                           | <ul style="list-style-type: none"> <li>- NS</li> </ul>                                                        | NS/NS      | 1  | CR | V |
|                         | Elmas O, <i>et al.</i> 2020 <sup>111</sup>     | <ul style="list-style-type: none"> <li>- White to pinkish overlapping papillomatous structures (100%)</li> <li>- White and red structureless areas (100%)</li> <li>- Blood spots (100%)</li> <li>- Polymorphous vessels including dotted, coiled, serpentine complex looped vessels with an annular arrangement (100%)</li> </ul> | <ul style="list-style-type: none"> <li>- NA</li> <li>- White structureless area/NA</li> <li>- Purple dots</li> <li>- Dotted and linear-curved vessels</li> </ul> | <ul style="list-style-type: none"> <li>- NS</li> <li>- NS</li> <li>- NS</li> <li>- NS</li> </ul>              | NS/NS      | 1  | CR | V |
| Tinea nigra             | Gupta G, <i>et al.</i> 1997 <sup>112</sup>     | <ul style="list-style-type: none"> <li>- Regularly distributed pigmented spicules without pigment network (100%)</li> </ul>                                                                                                                                                                                                       | <ul style="list-style-type: none"> <li>- NA</li> </ul>                                                                                                           | <ul style="list-style-type: none"> <li>- NS</li> </ul>                                                        | NS/x10     | 1  | CR | V |
|                         | Smith SB, <i>et al.</i> 2001 <sup>113</sup>    | <ul style="list-style-type: none"> <li>- Homogeneous nonmelanocytic pigment pattern not following the dermatoglyphic lines (100%)</li> </ul>                                                                                                                                                                                      | <ul style="list-style-type: none"> <li>- NA</li> </ul>                                                                                                           | <ul style="list-style-type: none"> <li>- NS</li> </ul>                                                        | NS/x10     | 1  | CR | V |
|                         | Xavier MS, <i>et al.</i> 2008 <sup>114</sup>   | <ul style="list-style-type: none"> <li>- Homogeneous nonmelanocytic pigmented pattern with spicules that did not follow the dermatoglyphic lines in (100%)</li> </ul>                                                                                                                                                             | <ul style="list-style-type: none"> <li>- NA</li> </ul>                                                                                                           | <ul style="list-style-type: none"> <li>- NS</li> </ul>                                                        | NS/NS      | 1  | CR | V |
|                         | Pascoal FM, <i>et al.</i> 2010 <sup>122</sup>  | <ul style="list-style-type: none"> <li>- Irregularly distributed dark brown-pigmented lesions with filamentous aspect formed by dots and traces(100%)</li> </ul>                                                                                                                                                                  | <ul style="list-style-type: none"> <li>- NA</li> </ul>                                                                                                           | <ul style="list-style-type: none"> <li>- NS</li> </ul>                                                        | NS/10x/70x | 6  | CS | V |
|                         | Piliouras P, <i>et al.</i> 2011 <sup>126</sup> | <ul style="list-style-type: none"> <li>- Superficial fine, wispy, light brown strands which form a reticular-like patch usually with a uniform brown colour (these do</li> </ul>                                                                                                                                                  | <ul style="list-style-type: none"> <li>- NA</li> </ul>                                                                                                           | <ul style="list-style-type: none"> <li>- NS</li> </ul>                                                        | NS/x10     | 13 | CS | V |

|  |                                                     |                                                                                                                                                                                                                     |                                                      |                                                                                          |        |   |    |   |  |
|--|-----------------------------------------------------|---------------------------------------------------------------------------------------------------------------------------------------------------------------------------------------------------------------------|------------------------------------------------------|------------------------------------------------------------------------------------------|--------|---|----|---|--|
|  |                                                     | not follow the furrows and ridges normally in this skin) (53.8%)                                                                                                                                                    |                                                      |                                                                                          |        |   |    |   |  |
|  | Criado PR, <i>et al.</i> 2013 <sup>115</sup>        | - Superficial fine, wispy pigmented spicules, not following the dermatoglyphic lines (100%)                                                                                                                         | - NA                                                 | - NS                                                                                     | NS/x10 | 1 | CR | V |  |
|  | Rossetto AI, <i>et al.</i> 2014 <sup>116</sup>      | - Darkened irregular punctiform pigmentation (100%)                                                                                                                                                                 | - NA                                                 | - NS                                                                                     | NS/NS  | 1 | CR | V |  |
|  | Guarenti IM, <i>et al.</i> 2014 <sup>117</sup>      | - Homogeneous nonmelanocytic pigmented pattern with spicules (100%)                                                                                                                                                 | - NA                                                 | - NS                                                                                     | NS/NS  | 1 | CR | V |  |
|  | Noguchi H, <i>et al.</i> 2015 <sup>124</sup>        | - Well-defined pigmented macule, and a brown to gray-colored, fine-dotted and granule-like structure overlapped with light brown amorphous pigmentation of whole background showing a parallel ridge pattern (100%) | - Brown dots over a diffuse brown structureless area | - Melanin produced by fungus reflecting colonies randomly distributed in the horny layer | NS/20x | 1 | CR | V |  |
|  | Thomas CL, <i>et al.</i> 2016 <sup>118</sup>        | - A regular pattern of gray-brown spicules, with no evidence of a pigment network (100%)                                                                                                                            | - NA                                                 | - NS                                                                                     | NS/NS  | 1 | CR | V |  |
|  | Maia Abinader MV, <i>et al.</i> 2016 <sup>123</sup> | - A brown, fine-dotted, and granular structure overlapping an amorphous light brown macule, not following dermatoglyphic lines (100%)                                                                               | - Brown dots over a brown structureless area         | - Pigmented hyphae in the stratum corneum                                                | NS/NS  | 1 | CR | V |  |
|  | Nazzaro G, <i>et al.</i> 2016 <sup>125</sup>        | - Weak pigmentation composed of thin bundles of spicules that were arranged in a parallel ridge pattern                                                                                                             | - NA                                                 | - NS                                                                                     | NS/NS  | 1 | CR | V |  |
|  | Veasey JV, <i>et al.</i> 2017 <sup>119</sup>        | - Non-melanocytic pattern composed of linear spiked structures that do not follow palmar dermatoglyphics (100%)                                                                                                     | - NA                                                 | - Vegetative mycelium of the fungus                                                      | NS/NS  | 1 | CR | V |  |



|              |                                                                                                                                                                                                                                                                |                                                                                                                                                                                                                                                                                                                                                                                                            |                                                                                                                                      |                                                                                                                                                                                                     |                                                                                 |                                               |                                                   |                                              |
|--------------|----------------------------------------------------------------------------------------------------------------------------------------------------------------------------------------------------------------------------------------------------------------|------------------------------------------------------------------------------------------------------------------------------------------------------------------------------------------------------------------------------------------------------------------------------------------------------------------------------------------------------------------------------------------------------------|--------------------------------------------------------------------------------------------------------------------------------------|-----------------------------------------------------------------------------------------------------------------------------------------------------------------------------------------------------|---------------------------------------------------------------------------------|-----------------------------------------------|---------------------------------------------------|----------------------------------------------|
|              | <p>Veasey JV, <i>et al.</i> 2017<sup>120</sup></p> <p>Nogita A, <i>et al.</i> 2018<sup>127</sup></p> <p>Valentim F, <i>et al.</i> 2021<sup>121</sup></p>                                                                                                       | <ul style="list-style-type: none"> <li>- Non-melanocytic pattern of macular lesion with superficial chestnut-brown speckled pigmentation, without grooves or crests (100%)</li> <li>- Parallel, pigmented lines in the ridges consisting of fine brown dots which aggregated to form reticular pattern (100%)</li> <li>- Superficial, thin pigmented spicules forming a reticular pattern(100%)</li> </ul> | <ul style="list-style-type: none"> <li>- NA</li> <li>- Brown dots forming parallel brown lines</li> <li>- NA</li> </ul>              | <ul style="list-style-type: none"> <li>- NS</li> <li>- Brown fungal elements in the upper horny layer</li> <li>- NS</li> </ul>                                                                      | <p>Polarized/x10</p> <p>NS/NS</p> <p>NS/NS</p>                                  | <p>1</p> <p>1</p> <p>1</p>                    | <p>CR</p> <p>CR</p> <p>CR</p>                     | <p>V</p> <p>V</p> <p>V</p>                   |
| White piedra | <p>Zhuang K, <i>et al.</i> 2016<sup>130</sup></p> <p>Veasey JV, <i>et al.</i> 2017<sup>120</sup></p> <p>Landro J, <i>et al.</i> 2017<sup>128</sup></p> <p>Bonifaz A, <i>et al.</i> 2019<sup>129</sup></p> <p>Lacarrubba F, <i>et al.</i> 2019<sup>50</sup></p> | <ul style="list-style-type: none"> <li>- Creamy yellow nodules distributed along the hair at irregular interval (100%)</li> <li>- Whitish nodules attached to the hair(100%)</li> <li>- Small white-yellow concretions along the hair shaft (100%)</li> <li>- Irregular white nodules (concretions) (100%)</li> <li>- Multiple, ovular whitish masses scattered along the hair shafts</li> </ul>           | <ul style="list-style-type: none"> <li>- NA</li> <li>- NA</li> <li>- NA</li> <li>- NA</li> <li>- NA</li> </ul>                       | <ul style="list-style-type: none"> <li>- NS</li> <li>- NS</li> <li>- NS</li> <li>- NS</li> <li>- NS</li> </ul>                                                                                      | <p>NS/NS</p> <p>Polarized/NS</p> <p>NS/NS</p> <p>NS/NS</p> <p>Polarized/x10</p> | <p>1</p> <p>1</p> <p>1</p> <p>14</p> <p>1</p> | <p>CR</p> <p>CR</p> <p>CR</p> <p>CS</p> <p>CR</p> | <p>V</p> <p>V</p> <p>V</p> <p>V</p> <p>V</p> |
| Tinea manuum | <p>Errichetti E, <i>et al.</i> 2018<sup>131</sup></p> <p>Jakhar D, <i>et al.</i> 2019<sup>133</sup></p>                                                                                                                                                        | <ul style="list-style-type: none"> <li>- White scaling mainly located in the creases (100%)</li> <li>- White scales in skin furrows and dermatoglyphics (100%)</li> <li>- Dotted vessels localized to skin furrows (100%)</li> </ul>                                                                                                                                                                       | <ul style="list-style-type: none"> <li>- White scales (in skin furrows)</li> <li>- White scales</li> <li>- Dotted vessels</li> </ul> | <ul style="list-style-type: none"> <li>- Predilection of fungal organism to grow in palmar furrows</li> <li>- NS</li> <li>- Reactionary vasodilation in response to inflammatory process</li> </ul> | <p>Polarized/x10</p> <p>Polarized/200x</p>                                      | <p>1</p> <p>1</p>                             | <p>CR</p> <p>CR</p>                               | <p>V</p> <p>V</p>                            |

|                |                                                   |                                                                                                                                                                                                                                                                                                                                                |                                                                                                                                                      |                                                                                                                                                                                                                                                                     |                  |                                 |    |    |
|----------------|---------------------------------------------------|------------------------------------------------------------------------------------------------------------------------------------------------------------------------------------------------------------------------------------------------------------------------------------------------------------------------------------------------|------------------------------------------------------------------------------------------------------------------------------------------------------|---------------------------------------------------------------------------------------------------------------------------------------------------------------------------------------------------------------------------------------------------------------------|------------------|---------------------------------|----|----|
|                | Bhat YJ, <i>et al.</i> 2019 <sup>132</sup>        | <ul style="list-style-type: none"> <li>- Whitish scales along creases (100%)</li> <li>- Brownish scales showing dried vesicles (NS)</li> <li>- Intense erythema due to patchy vessels (NS)</li> </ul>                                                                                                                                          | <ul style="list-style-type: none"> <li>- White scales</li> <li>- NA</li> <li>- NA</li> </ul>                                                         | <p>induced by dermatophytes</p> <ul style="list-style-type: none"> <li>- NS</li> <li>- NS</li> <li>- NS</li> </ul>                                                                                                                                                  | NS/x10           | 10 (Tinea manuum + Tinea pedis) | CS | V  |
| Tinea corporis | Vazquez-L pez F, <i>et al.</i> 2004 <sup>63</sup> | <ul style="list-style-type: none"> <li>- Mixed vascular findings (linear + globular vessels) (100%)</li> </ul>                                                                                                                                                                                                                                 | <ul style="list-style-type: none"> <li>- Linear and dotted vessels</li> </ul>                                                                        | <ul style="list-style-type: none"> <li>- NS</li> </ul>                                                                                                                                                                                                              | Nonpolarized/x10 | 5                               | CS | V  |
|                | Knopfel N, <i>et al.</i> 2015 <sup>134</sup>      | <ul style="list-style-type: none"> <li>- Erythematous background (100%)</li> <li>- Scales (100%)</li> <li>- Micropustules (100%)</li> <li>- Multiple brown spots, some with loss of vellus hair (100%)</li> <li>- Surrounding white-yellowish halo (100%)</li> </ul>                                                                           | <ul style="list-style-type: none"> <li>- NA</li> <li>- White scales</li> <li>- NA</li> <li>- NA</li> <li>- White-yellow circles</li> </ul>           | <ul style="list-style-type: none"> <li>- NS</li> <li>- NS</li> <li>- NS</li> <li>- NS</li> <li>- NS</li> </ul>                                                                                                                                                      | NS/NS            | 1                               | CR | V  |
|                | Kobayashi M, <i>et al.</i> 2018 <sup>135</sup>    | <ul style="list-style-type: none"> <li>- Red papules that matched hair follicles (100%)</li> <li>- Circular white spot around vellus hair</li> </ul>                                                                                                                                                                                           | <ul style="list-style-type: none"> <li>- NA</li> <li>- White circles</li> </ul>                                                                      | <ul style="list-style-type: none"> <li>- NS</li> <li>- NS</li> </ul>                                                                                                                                                                                                | NS/NS            | 1                               | CR | V  |
|                | Bhat YJ, <i>et al.</i> 2019 <sup>132</sup>        | <ul style="list-style-type: none"> <li>- Diffuse erythema (100%)</li> <li>- Scaly broken hair (53.3%)</li> <li>- Whitish scales (100%)</li> <li>- Follicular micropustules (36.6%)</li> <li>- Brown spots surrounded by a white-yellowish halo (20%)</li> <li>- Wavy hair (13.33%)</li> <li>- Morse code hair of vellus hair (3.3%)</li> </ul> | <ul style="list-style-type: none"> <li>- NA</li> <li>- NA</li> <li>- White scales</li> <li>- NA</li> <li>- NA</li> <li>- NA</li> <li>- NA</li> </ul> | <ul style="list-style-type: none"> <li>- NS</li> <li>- NS</li> <li>- NS</li> <li>- NS</li> <li>- Invasion of hair follicle</li> <li>- NS</li> <li>- Masses of arthroconidia formed at intervals separated by thinner fragments where only hyphae develop</li> </ul> | NS/x10           | 30                              | CS | V  |
|                | Lekkas D, <i>et al.</i> 2020 <sup>136</sup>       | <ul style="list-style-type: none"> <li>- Dotted vessels (100%): patchy (36.4%), peripheral (63.6%)</li> </ul>                                                                                                                                                                                                                                  | <ul style="list-style-type: none"> <li>- Dotted vessels: patchy/peripheral</li> </ul>                                                                | <ul style="list-style-type: none"> <li>- NS</li> </ul>                                                                                                                                                                                                              | NS/NS            | 36                              | CC | IV |

|                 |                                                      |                                                                                                                                                                                                                                                                                                                                                                                                                                                                                    |                                                                                                                                                                                                             |                                                                                                                                                                               |                |    |    |   |
|-----------------|------------------------------------------------------|------------------------------------------------------------------------------------------------------------------------------------------------------------------------------------------------------------------------------------------------------------------------------------------------------------------------------------------------------------------------------------------------------------------------------------------------------------------------------------|-------------------------------------------------------------------------------------------------------------------------------------------------------------------------------------------------------------|-------------------------------------------------------------------------------------------------------------------------------------------------------------------------------|----------------|----|----|---|
|                 | Llamas Carmona JA, <i>et al.</i> 2021 <sup>137</sup> | <ul style="list-style-type: none"> <li>- Scales: white (86.1%), yellow (0%), both (13.9%); diffuse (2.9%) patchy (17.6%), central (2.9%), peripheral (76.5%), perifollicular scales (13.9%), and moth-eaten scales (97.2%)</li> <li>- Broken hair (63.9%)</li> <li>- Peeling direction: outward (97.2%), none (2.8%)</li> <li>- Comedones with double openings, “Dominant” orifice connected to a smaller orifice by a thin layer of epidermis (100%) in healing lesion</li> </ul> | <ul style="list-style-type: none"> <li>- Scales: white/yellow with central, unspecific, diffuse, peripheral and perifollicular distribution</li> <li>- Specific clue</li> <li>- NA</li> <li>- NA</li> </ul> | <ul style="list-style-type: none"> <li>- NS</li> <li>- NS</li> <li>- NS</li> <li>- Comedone formation secondary to vellus hair invasion by the fungus</li> </ul>              | NS/NS          | 1  | CR | V |
| Tinea incognito | Gómez Moyano E, <i>et al.</i> 2016 <sup>138</sup>    | <ul style="list-style-type: none"> <li>- Scaly, broken, translucent hair (100%)</li> <li>- Morse code hair (100%)</li> </ul>                                                                                                                                                                                                                                                                                                                                                       | <ul style="list-style-type: none"> <li>- NA</li> <li>- NA</li> </ul>                                                                                                                                        | <ul style="list-style-type: none"> <li>- NS</li> <li>- Localised area of fungal infection, seen as perforating fungal invasion of vellus hair on direct microscopy</li> </ul> | NS/NS          | 1  | CR | V |
|                 | Piccolo V, <i>et al.</i> 2019 <sup>139</sup>         | <ul style="list-style-type: none"> <li>- Erythematous background (100%)</li> <li>- Nonspecific vascular pattern (100%)</li> <li>- Micro pustules (100%)</li> <li>- Black dots surrounded by white-yellowish halo (100%)</li> </ul>                                                                                                                                                                                                                                                 | <ul style="list-style-type: none"> <li>- NA</li> <li>- NA</li> <li>- NA</li> <li>- NA</li> </ul>                                                                                                            | <ul style="list-style-type: none"> <li>- NS</li> </ul>                                                                                                                        | NS/NS          | 1  | CR | V |
|                 | Sonthalia S, <i>et al.</i> 2019 <sup>140</sup>       | <ul style="list-style-type: none"> <li>- Patchy erythema (100%)</li> <li>- Perifollicular scales and casts (100%)</li> <li>- Black dots(100%)</li> <li>- Broken, bent deformable, Morse-code hairs, comma and cork-screw and translucent hairs (100%)</li> <li>- Dotted vessels and telangiectasias (100%)</li> </ul>                                                                                                                                                              | <ul style="list-style-type: none"> <li>- NA</li> <li>- NA</li> <li>- NA</li> <li>- NA</li> <li>- Dotted vessels</li> </ul>                                                                                  | <ul style="list-style-type: none"> <li>- NS</li> <li>- NS</li> <li>- NS</li> <li>- Fungal invasion of hair</li> <li>- NS</li> </ul>                                           | Polarized/20x  | 1  | CR | V |
|                 | Singal A, <i>et al.</i> 2019 <sup>141</sup>          | <ul style="list-style-type: none"> <li>- Background erythema (100%)</li> <li>- Dilated linear, tortuous, and/or dotted vessels (75%)</li> <li>- Peripheral whitish scales (100%)</li> </ul>                                                                                                                                                                                                                                                                                        | <ul style="list-style-type: none"> <li>- NA</li> <li>- Linear, linear-curved, and dotted vessels</li> <li>- Peripheral white scales</li> </ul>                                                              | <ul style="list-style-type: none"> <li>- NS</li> <li>- NS</li> <li>- NS</li> </ul>                                                                                            | Polarized/200x | 14 | CS | V |

|                      |                                                   |                                                                                                                                                                                                                                                                                                                                                                                                                                                                                   |                                                                                                                                                                              |                                                                                                                                                                                                                                                                    |                      |    |    |   |
|----------------------|---------------------------------------------------|-----------------------------------------------------------------------------------------------------------------------------------------------------------------------------------------------------------------------------------------------------------------------------------------------------------------------------------------------------------------------------------------------------------------------------------------------------------------------------------|------------------------------------------------------------------------------------------------------------------------------------------------------------------------------|--------------------------------------------------------------------------------------------------------------------------------------------------------------------------------------------------------------------------------------------------------------------|----------------------|----|----|---|
|                      | Bhat YJ <i>et al.</i> 2019 <sup>132</sup>         | <ul style="list-style-type: none"> <li>- Micropustules at the borders (83.33%)</li> <li>- Tinea of vellus hairs (16.67%)</li> <li>- Reddish brown haemorrhagic spots at the periphery (66.67%)</li> <li>- Morse code hairs of vellus hairs (47.3%)</li> <li>- Follicular micropustules (36.8%)</li> <li>- Concentric areas of erythema separated by scales (34.2%)</li> <li>- Easily deformable hairs that look weakened and transparent and show unusual bends 39.4%)</li> </ul> | <ul style="list-style-type: none"> <li>- NA</li> <li>- NA</li> <li>- NA</li> <li>- NA</li> <li>- NA</li> <li>- NA</li> </ul>                                                 | <ul style="list-style-type: none"> <li>- NS</li> <li>- NS</li> <li>- NS</li> <li>- NS</li> <li>- NS</li> <li>- Massive fungal invasion involving the whole hair shaft</li> </ul>                                                                                   | NS/x10               | 38 | CS | V |
| Tinea of vellus hair | Gómez-Moyano E, <i>et al.</i> 2015 <sup>143</sup> | <ul style="list-style-type: none"> <li>- Scaly plaques (100%)</li> <li>- Translucent hair (83%)</li> <li>- Follicular pustules (67%)</li> <li>- Broken hairs (50%)</li> <li>- Corkscrew hairs (17%)</li> <li>- Black dots (17%)</li> <li>- Dystrophic hairs (17%)</li> <li>- Morse code hair (17%)</li> <li>- Empty follicles (16.6%)</li> </ul>                                                                                                                                  | <ul style="list-style-type: none"> <li>- NA</li> </ul>                     | <ul style="list-style-type: none"> <li>- NS</li> <li>- Fungal invasion along entire length of hair</li> <li>- NS</li> <li>- NS</li> <li>- Cracking and bending of hair shaft filled with hyphae</li> <li>- NS</li> <li>- NS</li> <li>- NS</li> <li>- NS</li> </ul> | NS/x10               | 6  | CS | V |
|                      | Tang J, <i>et al.</i> 2020 <sup>142</sup>         | <ul style="list-style-type: none"> <li>- Non-homogeneous erythematous background (100%)</li> <li>- Scattered linear vessels (100%)</li> <li>- Follicular micropustules (100%)</li> <li>- Yellowish scales (100%)</li> <li>- White sheath around hair shaft (100%)</li> </ul> <p><i>UV Dermoscopy</i></p> <ul style="list-style-type: none"> <li>- Green fluorescence at the proximal hair shaft of the vellus hair (100%)</li> </ul>                                              | <ul style="list-style-type: none"> <li>- NA</li> <li>- Linear vessels; unspecific distribution</li> <li>- NA</li> <li>- Yellow scales</li> <li>- NA</li> <li>- NA</li> </ul> | <ul style="list-style-type: none"> <li>- NS</li> <li>- NS</li> <li>- NS</li> <li>- NS</li> <li>- NS</li> <li>- NS</li> </ul>                                                                                                                                       | Polarized and UV/50x | 1  | CR | V |
|                      | Liu Z-H, <i>et al.</i> 2022 <sup>144</sup>        | <ul style="list-style-type: none"> <li>- Curly and coiled hair (100%)</li> <li>- Bright-white fluorescence of vellus hair in UV (100%)</li> </ul>                                                                                                                                                                                                                                                                                                                                 | <ul style="list-style-type: none"> <li>- NA</li> <li>- NA</li> </ul>                                                                                                         | <ul style="list-style-type: none"> <li>- NS</li> <li>- NS</li> </ul>                                                                                                                                                                                               | Polarized and UV/NS  | 1  | CR | V |

|                                        |                                              |                                                                                                                                                                                                                                                                                                                                                                      |                                                                                                                                                                                                                                    |                                                                                                                                                                                                                                                               |               |                      |    |   |
|----------------------------------------|----------------------------------------------|----------------------------------------------------------------------------------------------------------------------------------------------------------------------------------------------------------------------------------------------------------------------------------------------------------------------------------------------------------------------|------------------------------------------------------------------------------------------------------------------------------------------------------------------------------------------------------------------------------------|---------------------------------------------------------------------------------------------------------------------------------------------------------------------------------------------------------------------------------------------------------------|---------------|----------------------|----|---|
| Majocchi's granuloma                   | Piccolo V, <i>et al.</i> 2019 <sup>145</sup> | - Yellowish and orange structureless areas (100%)                                                                                                                                                                                                                                                                                                                    | - Yellow/orange structureless areas                                                                                                                                                                                                | - NS                                                                                                                                                                                                                                                          | Polarized/NS  | 1                    | CR | V |
|                                        | Akay BN, <i>et al.</i> 2019 <sup>146</sup>   | - Central yellowish crust (100%)<br>- Peripheral blue structureless area (100%)<br>- Polymorphous vessels (serpentine, coiled, looped with bulbous endings) (100%)<br>- Haemorrhages and clod vessels of different sizes (100%)                                                                                                                                      | - Yellow crust<br>- Peripheral blue structureless area<br>- Dotted and linear-curved vessels<br>- Purple dots                                                                                                                      | - NS<br>- NS<br>- NS<br>- NS                                                                                                                                                                                                                                  | NS/NS         | 1                    | CR | V |
| <i>Talaromyces marneffei</i> infection | Li Q, <i>et al.</i> 2018 <sup>148</sup>      | - Round or homogenous whitish background (100%)<br>- Only whitish amorphous structure (39.1%)<br>- Whitish background with central keratin plug (23.9%) ("white jade coin pendant" sign)<br>- Whitish background, central keratin plug and radial comma vessels (13%)<br>- Whitish background and central haemorrhagic ulcer (23.9%)("white jade coin pendant" sign) | - White structureless area<br>- White structureless area<br>- White structureless area with follicular plug: specific clue<br>- White structureless area with follicular plug with linear vessels with branches<br>- Specific clue | - Granuloma and infiltration of multiple ingested yeast histiocytes<br>- Granuloma and infiltration of multiple ingested yeast histiocytes<br>- Inlaid porokeratosis (keratin plug)<br>- Capillary vessels around keratin plug (radial comma vessels)<br>- NS | NS/NS         | 1 patient/46 lesions | CR | V |
|                                        | Xian J, <i>et al.</i> 2019 <sup>147</sup>    | - Circular or quasi-circular whitish amorphous structure with a central brownish keratin plug ("white jade coin pendant" sign) (70.6%)<br>- Irregular whitish amorphous structures with haemorrhagic area of reddish brown color (23.5%)<br>- Irregular homogenous whitish amorphous structure                                                                       | - Specific clue<br>- NA<br>- NA                                                                                                                                                                                                    | - NS<br>- NS<br>- NS                                                                                                                                                                                                                                          | NS/NS         | 1 patient/17 lesions | CR | V |
|                                        | Xu X, <i>et al.</i> 2019 <sup>149</sup>      | - Molluscum like lesions (100%): papules and nodules with an umbilicated notch, central necrosis, punctiform vessels                                                                                                                                                                                                                                                 | - NA                                                                                                                                                                                                                               | - NS                                                                                                                                                                                                                                                          | Polarized/x50 | 1                    | CR | V |

|                          |                                                      |                                                                                                                                                                                                                                                                                                               |                                                                                                                                                                                                |                                                                                                                                                                                         |               |   |    |   |
|--------------------------|------------------------------------------------------|---------------------------------------------------------------------------------------------------------------------------------------------------------------------------------------------------------------------------------------------------------------------------------------------------------------|------------------------------------------------------------------------------------------------------------------------------------------------------------------------------------------------|-----------------------------------------------------------------------------------------------------------------------------------------------------------------------------------------|---------------|---|----|---|
|                          |                                                      | <ul style="list-style-type: none"> <li>- Folliculitis/acne like lesions (100%): papules and nodules with scabs in the middle and hairs grown in and around</li> <li>- Xanthoma like: smooth surface</li> <li>- Vessels: tufted, hairpin, punctiform</li> </ul>                                                | <ul style="list-style-type: none"> <li>- NA</li> <li>- NA</li> <li>- Linear-curved and dotted vessels</li> </ul>                                                                               | <ul style="list-style-type: none"> <li>- NS</li> <li>- NS</li> <li>- Capillary hyperplasia and telangiectasias</li> </ul>                                                               |               |   |    |   |
| Cutaneous cryptococcosis | Slawinska M, <i>et al.</i> 2018 <sup>150</sup>       | <ul style="list-style-type: none"> <li>- White structureless area (100%)</li> <li>- Linear irregular and branched vessels of different sizes (100%)</li> <li>- Surrounding structureless yellowish halo (100%)</li> <li>- Pinkish background (100%)</li> <li>- White lines on the periphery (100%)</li> </ul> | <ul style="list-style-type: none"> <li>- White structureless area</li> <li>- Linear vessels with branches</li> <li>- Yellow structureless area</li> <li>- NA</li> <li>- White lines</li> </ul> | <ul style="list-style-type: none"> <li>- Fibrosis</li> <li>- Neovascularization</li> <li>- Granulomatous component</li> <li>- NS</li> <li>- NS</li> </ul>                               | NS/NS         | 1 | CR | V |
| Chromoblastomycosis      | Arguello-Guerra L, <i>et al.</i> 2016 <sup>152</sup> | <ul style="list-style-type: none"> <li>- Prominent white and pink areas (100%)</li> <li>- Brown dots (100%)</li> <li>- Crusts (100%)</li> <li>- Scales (100%)</li> </ul>                                                                                                                                      | <ul style="list-style-type: none"> <li>- NA</li> <li>- NA</li> <li>- NA</li> <li>- White scales</li> </ul>                                                                                     | <ul style="list-style-type: none"> <li>- NS</li> <li>- NS</li> <li>- NS</li> <li>- NS</li> </ul>                                                                                        | NS/NS         | 1 | CR | V |
|                          | Tang J, <i>et al.</i> 2017 <sup>153</sup>            | <ul style="list-style-type: none"> <li>- Irregular reddish black dots (100%)</li> <li>- Pink white background (100%)</li> <li>- Scales (100%)</li> </ul>                                                                                                                                                      | <ul style="list-style-type: none"> <li>- NA</li> <li>- NA</li> <li>- NA</li> </ul>                                                                                                             | <ul style="list-style-type: none"> <li>- Transepithelial elimination of products of the inflammatory response and haemorrhages</li> <li>- NS</li> <li>- NS</li> </ul>                   | NS/x50        | 1 | CR | V |
|                          | Subhadarshani S, <i>et al.</i> 2017 <sup>154</sup>   | <ul style="list-style-type: none"> <li>- Reddish pink background (100%)</li> <li>- Yellow-orange ovoid structures (100%)</li> <li>- Brown/Black dots</li> </ul>                                                                                                                                               | <ul style="list-style-type: none"> <li>- NA</li> <li>- Yellow/orange structureless area</li> <li>- NA</li> </ul>                                                                               | <ul style="list-style-type: none"> <li>- NS</li> <li>- Granuloma</li> <li>- Transepidermal elimination of the inflammatory cells and fungal elements along with haemorrhages</li> </ul> | Polarized/x16 | 1 | CR | V |
|                          | Chauhan P, <i>et al.</i> 2019 <sup>151</sup>         | <ul style="list-style-type: none"> <li>- Crusts and scales (100%)</li> <li>- Reddish black dots (100%)</li> </ul>                                                                                                                                                                                             | <ul style="list-style-type: none"> <li>- Yellow/white scales</li> <li>- NA</li> </ul>                                                                                                          | <ul style="list-style-type: none"> <li>- NS</li> <li>- Transepidermal elimination of inflammatory cells,</li> </ul>                                                                     | Polarized/x10 | 1 | CR | V |

|          |                                               |                                                                                                                                                                                                                                                                                                                                                                                                          |                                                                                                                                                                                                                                                                                                                         |                                                                                                                                                                                                                                                                                                                |               |   |    |   |
|----------|-----------------------------------------------|----------------------------------------------------------------------------------------------------------------------------------------------------------------------------------------------------------------------------------------------------------------------------------------------------------------------------------------------------------------------------------------------------------|-------------------------------------------------------------------------------------------------------------------------------------------------------------------------------------------------------------------------------------------------------------------------------------------------------------------------|----------------------------------------------------------------------------------------------------------------------------------------------------------------------------------------------------------------------------------------------------------------------------------------------------------------|---------------|---|----|---|
|          | Jayasree P, <i>et al.</i> 2019 <sup>155</sup> | <ul style="list-style-type: none"> <li>- Yellowish orange ovoid areas (100%)</li> <li>- Pinkish white background (100%)</li> <li>- Polymorphic vessels (100%)</li> <li>- White scales and yellow crusts in the periphery (100%)</li> <li>- White net-like pattern (100%)</li> </ul>                                                                                                                      | <ul style="list-style-type: none"> <li>- Focal yellow/orange structureless areas</li> <li>- NA</li> <li>- Dotted vessels</li> <li>- White scales and yellow crusts</li> <li>- White lines</li> </ul>                                                                                                                    | <ul style="list-style-type: none"> <li>foreign fungal elements, and haemorrhages</li> <li>Granuloma</li> <li>- NS</li> <li>- NS</li> <li>- NS</li> <li>- Diffuse hypergranulosis and pseudoepitheliomatous hyperplasia</li> <li>- NS</li> <li>- Fungal sclerotic bodies</li> <li>- NA</li> <li>- NA</li> </ul> | Polarized/x10 | 1 | CR | V |
|          | Katoch S, <i>et al.</i> 2020 <sup>156</sup>   | <ul style="list-style-type: none"> <li>- Polymorphous vessels (100%)</li> <li>- Brown spots (100%)</li> <li>- White and pink areas (100%)</li> <li>- Yellowish structureless areas (100%)</li> <li>- White net-like pattern in background (100%)</li> <li>- Structureless pink, white, and yellow areas (100%)</li> <li>- Scales, crusts (100%)</li> <li>- Reddish-brown to black dots (100%)</li> </ul> | <ul style="list-style-type: none"> <li>- Dotted and linear-curved vessels</li> <li>- Brown dots/globules</li> <li>- NA</li> <li>- Yellow structureless areas</li> <li>- White lines</li> <li>- Structureless white and yellow areas</li> <li>- White scales and yellow crusts</li> <li>- Brown dots/globules</li> </ul> | <ul style="list-style-type: none"> <li>- NS</li> <li>- NS</li> <li>- NS</li> <li>- Fungal sclerotic bodies and haemorrhages</li> </ul>                                                                                                                                                                         | Polarized/10x | 1 | CR | V |
| Mycetoma | Reis LM, <i>et al.</i> 2014 <sup>157</sup>    | <ul style="list-style-type: none"> <li>- Yellowish and white structures (100%)</li> </ul>                                                                                                                                                                                                                                                                                                                | <ul style="list-style-type: none"> <li>- Yellow/white structureless areas</li> </ul>                                                                                                                                                                                                                                    | <ul style="list-style-type: none"> <li>- NS</li> </ul>                                                                                                                                                                                                                                                         | NS/x10        | 1 | CR | V |
|          | Ankad BS, <i>et al.</i> 2019 <sup>158</sup>   | <ul style="list-style-type: none"> <li>- Yellow globules (100%)</li> <li>- White superficial scales (100%)</li> <li>- White structureless areas (100%)</li> <li>- Telangiectasias and dotted vessels (100%)</li> <li>- Blood spots (100%)</li> </ul>                                                                                                                                                     | <ul style="list-style-type: none"> <li>- Yellow globules</li> <li>- White scales</li> <li>- White structureless areas</li> <li>- Dotted vessels</li> <li>- NA</li> </ul>                                                                                                                                                | <ul style="list-style-type: none"> <li>- Dermal granulomas with many neutrophils</li> <li>- Hyperkeratosis</li> <li>- Fibrosis</li> <li>- NS</li> <li>- NS</li> </ul>                                                                                                                                          | Polarized/x10 | 1 | CR | V |
|          | Ankad BS, <i>et al.</i> 2019 <sup>159</sup>   | <ul style="list-style-type: none"> <li>- White-yellow areas (100%)</li> <li>- White scales (100%)</li> <li>- Brown-black/red/white globules (100%)</li> </ul>                                                                                                                                                                                                                                            | <ul style="list-style-type: none"> <li>- White/yellow structureless areas</li> <li>- White scales</li> <li>- Brown/red/white globules</li> </ul>                                                                                                                                                                        | <ul style="list-style-type: none"> <li>- Granulomas</li> <li>- Hyperkeratosis</li> <li>- Masses of fungi/dried blood and dilated vessels (red globules)</li> </ul>                                                                                                                                             | Polarized/x10 | 1 | CR | V |

|                       |                                              |                                                                                                                                                                                                                                                                                                                                                                                                                                                                                                                                                                                                                                                                                                                                                                               |                                                                                                                                                                                          |                                                                                                                                                                                      |               |    |    |   |
|-----------------------|----------------------------------------------|-------------------------------------------------------------------------------------------------------------------------------------------------------------------------------------------------------------------------------------------------------------------------------------------------------------------------------------------------------------------------------------------------------------------------------------------------------------------------------------------------------------------------------------------------------------------------------------------------------------------------------------------------------------------------------------------------------------------------------------------------------------------------------|------------------------------------------------------------------------------------------------------------------------------------------------------------------------------------------|--------------------------------------------------------------------------------------------------------------------------------------------------------------------------------------|---------------|----|----|---|
|                       | Litaiem N, <i>et al.</i> 2019 <sup>160</sup> | <ul style="list-style-type: none"> <li>- Small black grains (100%)</li> <li>- Structureless blue-white areas (100%)</li> <li>- Surrounding white halo (100%)</li> <li>- Polymorphic vessels (100%)</li> </ul>                                                                                                                                                                                                                                                                                                                                                                                                                                                                                                                                                                 | <ul style="list-style-type: none"> <li>- Specific clue</li> <li>- Structureless blue-white areas</li> <li>- White circle</li> <li>- NA</li> </ul>                                        | <ul style="list-style-type: none"> <li>- NS</li> <li>- Subcutaneous compact masses of pigmented fungi</li> <li>- NS</li> <li>- NS</li> </ul>                                         | NS/NS         | 1  | CR | V |
| Pityriasis versicolor | Zhou H, <i>et al.</i> 2015 <sup>161</sup>    | <ul style="list-style-type: none"> <li>- Pigmented network composed of pigmented stripes (100%)</li> <li>- Fine white scaling (100%)</li> </ul>                                                                                                                                                                                                                                                                                                                                                                                                                                                                                                                                                                                                                               | <ul style="list-style-type: none"> <li>- Brown lines</li> <li>- White scaling</li> </ul>                                                                                                 | <ul style="list-style-type: none"> <li>- NS</li> <li>- NS</li> </ul>                                                                                                                 | NS/NS         | 1  | CR | V |
|                       | Thomas N, <i>et al.</i> 2019 <sup>162</sup>  | <ul style="list-style-type: none"> <li>- Wire fence appearance:</li> <li>- Very fine scales along natural skin creases (100%)</li> <li>- Background of hypopigmented skin (100%)</li> </ul>                                                                                                                                                                                                                                                                                                                                                                                                                                                                                                                                                                                   | <ul style="list-style-type: none"> <li>- NA</li> <li>- White scales</li> <li>- NA</li> </ul>                                                                                             | <ul style="list-style-type: none"> <li>- NS</li> <li>- NS</li> <li>- NS</li> </ul>                                                                                                   | Polarized/10x | 1  | CR | V |
|                       | Kaur I, <i>et al.</i> 2019 <sup>164</sup>    | <p>Total</p> <ul style="list-style-type: none"> <li>- Altered pigmentary network (100%)</li> <li>- Scaling (83.33%)</li> <li>- Contrast halo ring around primary altered ring (66.67%)</li> <li>- Folliculocentric pattern (66.67%)</li> <li>- Invasion of hair follicle by yeast seen as hypopigmentation of hair (20%)</li> </ul> <p>Hypopigmented variant (n=24)</p> <ul style="list-style-type: none"> <li>- Altered pigmentary network (100%)</li> <li>- Scaling (87.5%)</li> <li>- Contrast halo ring around primary altered ring (91.66%)</li> <li>- Folliculocentric pattern (83.33%)</li> <li>- Invasion of hair follicle (25%)</li> </ul> <p>Hyperpigmented variant (n=3)</p> <ul style="list-style-type: none"> <li>- Altered pigmentary network (100%)</li> </ul> | <ul style="list-style-type: none"> <li>- NA</li> <li>- Scales</li> <li>- NA</li> </ul> | <ul style="list-style-type: none"> <li>- NS</li> </ul> | Polarized/x50 | 30 | CS | V |



|                           |                                             |                                                                                                                                                                                                                                                                                                                                                                                                                                                                                                                                                                                                                                                                                                                                                                                                                                                                                                                                                                                                                                                                                                                                                                                                                                                                                      |                                                                                                                                                                                                                                                                                                                                                                                                                                                                                                                                                                                                                                     |                                                                                                                                                                                                                                                                                                                                                                                        |               |                                                                     |    |   |
|---------------------------|---------------------------------------------|--------------------------------------------------------------------------------------------------------------------------------------------------------------------------------------------------------------------------------------------------------------------------------------------------------------------------------------------------------------------------------------------------------------------------------------------------------------------------------------------------------------------------------------------------------------------------------------------------------------------------------------------------------------------------------------------------------------------------------------------------------------------------------------------------------------------------------------------------------------------------------------------------------------------------------------------------------------------------------------------------------------------------------------------------------------------------------------------------------------------------------------------------------------------------------------------------------------------------------------------------------------------------------------|-------------------------------------------------------------------------------------------------------------------------------------------------------------------------------------------------------------------------------------------------------------------------------------------------------------------------------------------------------------------------------------------------------------------------------------------------------------------------------------------------------------------------------------------------------------------------------------------------------------------------------------|----------------------------------------------------------------------------------------------------------------------------------------------------------------------------------------------------------------------------------------------------------------------------------------------------------------------------------------------------------------------------------------|---------------|---------------------------------------------------------------------|----|---|
|                           | Mathur M, <i>et al.</i> 2019 <sup>163</sup> | <ul style="list-style-type: none"> <li>- Scaling (66.66%)</li> <li>- Contrast halo ring around primary altered ring (66.66%)</li> <li>- Folliculocentric pattern (66.66%)</li> </ul> <p>Mix variant (n=3)</p> <ul style="list-style-type: none"> <li>- Altered pigmentary network (100%)</li> <li>- Scaling (66.66%)</li> <li>- Contrast halo ring around primary altered ring (33.33%)</li> <li>- Folliculocentric pattern (33.33%)</li> </ul> <p>Hypopigmented lesions (n=164)</p> <ul style="list-style-type: none"> <li>- Nonuniform pigmentation (92.68%)</li> <li>- Clearly demarcated border (15.85%)</li> <li>- Perilesional pigmentation (34.15%)</li> <li>- Inconspicuous ridges and furrows (88.41%)</li> <li>- Scaling (86.58%): patchy (57.93%), furrows (28.66%), diffuse (8.54%), peripheral (5.49%), perifollicular (7.93%)</li> <li>- Vascular pattern: linear branching vessels (8.54%), dotted vessels (2.44%)</li> </ul> <p><u>Hyperpigmented lesions (n=14)</u></p> <ul style="list-style-type: none"> <li>- Nonuniform pigmentation (100%)</li> <li>- Clearly demarcated border (14.29%)</li> <li>- Inconspicuous ridges and furrows (85.71%)</li> <li>- Scaling (92.86%): patchy (28.57%), furrows (50%), diffuse (35.71%), perifollicular (7.14%)</li> </ul> | <ul style="list-style-type: none"> <li>- Scales</li> <li>- NA</li> <li>- NA</li> <li>- NA</li> </ul> <ul style="list-style-type: none"> <li>- NA</li> <li>- Scales</li> <li>- NA</li> <li>- White scales (distribution: unspecific, in the skin furrows, diffuse or perifollicular)</li> <li>- Linear vessels with branches and dotted vessels</li> </ul> <ul style="list-style-type: none"> <li>- NA</li> <li>- NA</li> <li>- NA</li> <li>- White scales (distribution: unspecific, in the skin furrows, diffuse or perifollicular)</li> </ul> | <ul style="list-style-type: none"> <li>- NS</li> <li>- NS</li> <li>- NS</li> <li>- NS</li> </ul> <ul style="list-style-type: none"> <li>- NS</li> </ul> <ul style="list-style-type: none"> <li>- NS</li> <li>- NS</li> <li>- NS</li> <li>- NS</li> </ul> | Polarized/10x | 125 patients (164 hypopigmented lesions, 14 hyperpigmented lesions) | CS | V |
| Pityrosporum folliculitis | Jakhar D, <i>et al.</i> 2018 <sup>165</sup> | <ul style="list-style-type: none"> <li>- Folliculocentric papules and pustules with surrounding erythema (100%)</li> </ul>                                                                                                                                                                                                                                                                                                                                                                                                                                                                                                                                                                                                                                                                                                                                                                                                                                                                                                                                                                                                                                                                                                                                                           | <ul style="list-style-type: none"> <li>- NA</li> </ul>                                                                                                                                                                                                                                                                                                                                                                                                                                                                                                                                                                              | <ul style="list-style-type: none"> <li>- NS</li> </ul>                                                                                                                                                                                                                                                                                                                                 | Polarized/x50 | 15                                                                  | CS | V |

|  |                                           |                                                                                                                                                                                                                                                                                                                                       |                                                                                                  |                                                                                                                                      |       |    |    |    |  |
|--|-------------------------------------------|---------------------------------------------------------------------------------------------------------------------------------------------------------------------------------------------------------------------------------------------------------------------------------------------------------------------------------------|--------------------------------------------------------------------------------------------------|--------------------------------------------------------------------------------------------------------------------------------------|-------|----|----|----|--|
|  |                                           | <ul style="list-style-type: none"> <li>- Perilesional, dirty white scaling (73.3%)</li> <li>- Keratosis pilaris like features (coiled/looped hair follicle with surrounding erythema, scaling) (53.3%)</li> <li>- Hypopigmentation of hair shaft (60%)</li> <li>- Perilesional brownish discoloration in resolving lesions</li> </ul> | <ul style="list-style-type: none"> <li>- NA</li> <li>- NA</li> <li>- NA</li> <li>- NA</li> </ul> | <ul style="list-style-type: none"> <li>- NS</li> <li>- NS</li> <li>- Invasion of hair shaft by yeast spores</li> <li>- NS</li> </ul> |       |    |    |    |  |
|  | Durdu M, <i>et al.</i> 2019 <sup>42</sup> | <ul style="list-style-type: none"> <li>- Peripheral, regularly distributed dotted vessels in the absence of other diagnostic findings</li> </ul>                                                                                                                                                                                      | <ul style="list-style-type: none"> <li>- Peripheral dotted vessels</li> </ul>                    | <ul style="list-style-type: none"> <li>- NS</li> </ul>                                                                               | NS/NS | 52 | CC | IV |  |

CC: Case control study; CR: Case report; CS: Case series; NA: Not available; NS: Not specified.
